## 1 **Functional Annotation of Human Long Non-Coding RNAs via Molecular Phenotyping**

2 Jordan Ramilowski<sup>1#</sup>, Chi Wai Yip<sup>1#</sup>, Saumya Agrawal<sup>1</sup>, Jen-Chien Chang<sup>1</sup>, Yari Ciani<sup>2</sup>, Ivan V  
3 Kulakovskiy<sup>3</sup>, Mickael Mendez<sup>4</sup>, Jasmine Li Ching Ooi<sup>1</sup>, John F Ouyang<sup>5</sup>, Nick Parkinson<sup>6</sup>,  
4 Andreas Petri<sup>7</sup>, Leonie Roos<sup>8</sup>, Jessica Severin<sup>1</sup>, Kayoko Yasuzawa<sup>1</sup>, Imad Abugessaisa<sup>1</sup>, Altuna  
5 Akalin<sup>9</sup>, Ivan Antonov<sup>10</sup>, Erik Arner<sup>1</sup>, Alessandro Bonetti<sup>1</sup>, Hidemasa Bono<sup>11</sup>, Beatrice Borsari<sup>12</sup>,  
6 Frank Brombacher<sup>13</sup>, Carlo Vittorio Cannistraci<sup>14</sup>, Christopher JF Cameron<sup>17</sup>, Ryan Cardenas<sup>15</sup>,  
7 Melissa Cardon<sup>1</sup>, Howard Chang<sup>16</sup>, Josée Dostie<sup>17</sup>, Luca Ducoli<sup>18</sup>, Alexander Favorov<sup>3</sup>, Alexandre  
8 Fort<sup>1</sup>, Diego Garrido<sup>12</sup>, Noa Gil<sup>19</sup>, Juliette Gimenez<sup>20</sup>, Reto Guler<sup>13</sup>, Lusy Handoko<sup>1</sup>, Jayson  
9 Harshbarger<sup>1</sup>, Akira Hasegawa<sup>1</sup>, Yuki Hasegawa<sup>1</sup>, Kosuke Hashimoto<sup>1</sup>, Norihito Hayatsu<sup>1</sup>, Peter  
10 Heutink<sup>22</sup>, Tetsuro Hirose<sup>23</sup>, Eddie L Imada<sup>24</sup>, Masayoshi Itoh<sup>21</sup>, Bogumil Kaczkowski<sup>1</sup>, Aditi  
11 Kanhere<sup>15</sup>, Emily Kawabata<sup>1</sup>, Hideya Kawaji<sup>21</sup>, Tsugumi Kawashima<sup>1</sup>, Tom Kelly<sup>1</sup>, Miki Kojima<sup>1</sup>,  
12 Naoto Kondo<sup>1</sup>, Haruhiko Koseki<sup>1</sup>, Tsukasa Kouno<sup>1</sup>, Anton Kratz<sup>1</sup>, Mariola Kurowska-Stolarska<sup>25</sup>,  
13 Andrew Tae Jun Kwon<sup>1</sup>, Jeffrey Leek<sup>24</sup>, Andreas Lennartsson<sup>26</sup>, Marina Lizio<sup>1</sup>, Fernando Lopez<sup>1</sup>,  
14 Joachim Luginbühl<sup>1</sup>, Shiori Maeda<sup>1</sup>, Vsevolod Makeev<sup>3</sup>, Luigi Marchionni<sup>24</sup>, Yulia A Medvedeva<sup>10</sup>,  
15 Aki Minoda<sup>1</sup>, Ferenc Müller<sup>15</sup>, Manuel Munoz Aguirre<sup>12</sup>, Mitsuyoshi Murata<sup>1</sup>, Hiromi Nishiyori<sup>1</sup>,  
16 Kazuhiro Nitta<sup>1</sup>, Shuhei Noguchi<sup>1</sup>, Yukihiko Noro<sup>1</sup>, Ramil Nurtdinov<sup>12</sup>, Yasushi Okazaki<sup>1</sup>, Valerio  
17 Orlando<sup>27</sup>, Denis Paquette<sup>17</sup>, Callum Parr<sup>1</sup>, Owen JL Rackham<sup>5</sup>, Patrizia Rizzu<sup>22</sup>, Diego Fernando  
18 Sanchez<sup>24</sup>, Albin Sandelin<sup>29</sup>, Pillay Sanjana<sup>15</sup>, Colin AM Semple<sup>6</sup>, Harshita Sharma<sup>1</sup>, Youtaro  
19 Shibayama<sup>1</sup>, Divya Sivaraman<sup>1</sup>, Takahiro Suzuki<sup>1</sup>, Suzannah Szumowski<sup>1</sup>, Michihira Tagami<sup>1</sup>,  
20 Martin S Taylor<sup>6</sup>, Chikashi Terao<sup>1</sup>, Malte Thodberg<sup>29</sup>, Supat Thongjuea<sup>1</sup>, Vidisha Tripathi<sup>30</sup>, Igor  
21 Ulitsky<sup>19</sup>, Roberto Verardo<sup>2</sup>, Ilya Vorontsov<sup>3</sup>, Chinatsu Yamamoto<sup>1</sup>, Robert S Young<sup>6</sup>, J Kenneth  
22 Baillie<sup>6</sup>, Alistair RR Forrest<sup>31</sup>, Roderic Guigó<sup>12</sup>, Michael M Hoffman<sup>32</sup>, Chung Chau Hon<sup>1</sup>, Takeya  
23 Kasukawa<sup>1</sup>, Sakari Kauppinen<sup>7</sup>, Juha Kere<sup>26</sup>, Boris Lenhard<sup>8</sup>, Claudio Schneider<sup>2</sup>, Harukazu  
24 Suzuki<sup>1</sup>, Ken Yagi<sup>1</sup>, FANTOM consortium, Michiel de Hoon<sup>1\*</sup>, Jay W Shin<sup>1\*</sup>, Piero Carninci<sup>1\*</sup>

25

26 \* Corresponding authors

27 michiel.dehoon@riken.jp (M.D.H.)

28 jay.shin@riken.jp (J.W.S.)

29 carninci@riken.jp (P.C.)

30

31 # these authors contributed equally to this work

32

### 33 Affiliations

34 1 RIKEN, Center for Integrative Medical Sciences, Japan

35 2 Consorzio Interuniversitario per le Biotecnologie, Italy

36 3 Vavilov Institute of General Genetics, Russian Federation

37 4 University of Toronto, Canada

38 5 Duke NUS Graduate Medical School, Singapore

39 6 MRC Human Genetics Unit, MRC IGMM, University of Edinburgh, United Kingdom

40 7 Center for RNA Medicine, Aalborg University, Denmark

41 8 Imperial College London, United Kingdom

42 9 Max Delbrück Center for Molecular Medicine, Germany

43 10 Research Center of Biotechnology of the Russian Academy of Sciences, Russian Federation

44 11 Research Organization of Information and Systems, Japan

45 12 Center for Genomic Regulation and Universitat Pompeu Fabra, Catalonia, Spain.

46 13 University of Cape Town, SAMRC & ICGB, South Africa

47 14 Technische Universität Dresden, Germany

48 15 University of Birmingham, United Kingdom

49 16 Stanford University, United States

50 17 McGill University, Canada

- 51 18 Swiss Federal Institute of Technology in Zurich, Switzerland
- 52 19 Weizmann Institute of Science, Israel
- 53 20 Fondazione Santa Lucia, Italy
- 54 21 RIKEN, Preventive Medicine & Diagnostic Innovation Program, Japan
- 55 22 German Center for Neurodegenerative Diseases, Germany
- 56 23 Hokkaido University, Japan
- 57 24 Johns Hopkins University, United States
- 58 25 University of Glasgow, United Kingdom
- 59 26 Karolinska Institute, Sweden
- 60 27 King Abdullah University of Science and Technology, Saudi Arabia
- 61 29 University of Copenhagen, Denmark
- 62 30 National Centre for Cell Science, India
- 63 31 Harry Perkins Institute of Medical Research, Australia
- 64 32 Princess Margaret Cancer Centre, Canada

## 65 **Abstract**

66 Long non-coding RNAs (lncRNAs) constitute the majority of transcripts in mammalian genomes  
67 and yet, their functions remain largely unknown. We systematically suppressed 285 lncRNAs in  
68 human dermal fibroblasts and quantified cellular growth, morphological changes, and  
69 transcriptomic responses using Capped Analysis of Gene Expression (CAGE). The resulting  
70 transcriptomic profiles recapitulated the observed cellular phenotypes, yielding specific roles for  
71 over 40% of analyzed lncRNAs in regulating distinct biological pathways, transcriptional  
72 machinery, alternative promoter activity and architecture usage. Overall, combining cellular and  
73 molecular profiling provided a powerful approach to unravel the distinct functions of lncRNAs,  
74 which we highlight with specific functional roles for *ZNF213-AS1* and *lnc-KHDC3L-2*.

75

## 76 **Introduction**

77 Over 50,000 loci in the human genome transcribe long non-coding RNA (lncRNA) (Hon et al.  
78 2017; Iyer et al. 2015), which are defined as transcripts at least 200 nt long with low or no protein-  
79 coding potential. While lncRNA genes outnumber protein-coding genes in mammalian genomes,  
80 they are comparatively less conserved (Ulitsky 2016), lowly expressed, and more cell-type-  
81 specific (Hon et al. 2017). However, the evolutionary conservation of lncRNA promoters (Carninci  
82 et al. 2005) and their structural motifs (Derrien et al. 2012) suggest that lncRNAs are fundamental  
83 biological regulators. To date, only a few hundred human lncRNAs have been extensively  
84 characterized (Quek et al. 2015; Volders et al. 2015; de Hoon et al. 2015), revealing their roles in  
85 regulating transcription (Engreitz, Ollikainen, et al. 2016), translation (Carrieri et al. 2012), and  
86 chromatin state (Gupta et al. 2010; Guttman and Rinn 2012; Guttman et al. 2011); (Ransohoff et  
87 al. 2018; Quinn and Chang 2016).

88

89 Our recent FANTOM5 analysis showed that 19,175 (out of ~27,000) human lncRNA loci are  
90 functionally implicated (Hon et al. 2017). However, genomic screens are necessary to  
91 comprehensively characterize each lncRNA. One common approach of gene knockdown followed  
92 by a cellular phenotype assay typically characterizes a small percentage of lncRNAs for a single  
93 observable phenotype. For example, a recent large-scale screening using CRISPR interference  
94 (CRISPRi) found that approximately 500 lncRNA loci (~3.7% of targeted lncRNA loci) are  
95 essential for cell growth or viability in a cell-type specific manner (Liu et al. 2017). In addition,  
96 CRISPR-Cas9 experiments targeting splice sites identified ~2.1% of lncRNAs that affect growth

97 of K562 chronic myeloid leukemia cells (Liu et al. 2018). A CRISPR activation study has also  
98 revealed ~0.11% lncRNAs to be important for drug resistance in melanoma (Joung et al. 2017).

99

100 As a part of the FANTOM 6 pilot project, we established an automated high-throughput cell culture  
101 platform to suppress 285 lncRNAs expressed in human primary dermal fibroblasts (HDF) using  
102 antisense LNA-modified gapmer antisense oligonucleotide (ASO) technology (Roux et al. 2017).  
103 We then quantified the effect of each knockdown on cell growth and morphology using real-time  
104 imaging, followed by Cap Analysis Gene Expression (CAGE; Murata et al. 2014) deep sequencing  
105 to reveal molecular pathways associated with each lncRNA. In contrast to cellular phenotyping,  
106 molecular phenotyping provides a detailed assessment of the response to an lncRNA knockdown  
107 at the molecular level, allowing biological functions to be associated to lncRNAs even in the  
108 absence of an observable cellular phenotype. We further investigated changes in promoter usage  
109 and architecture modulated by the knockdowns, and integrated genome-wide chromosome  
110 conformation capture data (Hi-C) with the CAGE data to explore regulatory functions of the  
111 lncRNA targets. All data produced for this study are publicly available at  
112 <http://fantom.gsc.riken.jp/6/datafiles> (user: review; password: f6plj0206) and analysis results can  
113 be explored at <http://fantom.gsc.riken.jp/zenbu/reports/#FANTOM6>

114

## 115 **Results**

### 116 **Selection and ASO-mediated knockdown of lncRNA targets**

117 Human dermal fibroblasts (HDF) are non-transformed primary cells that are commonly used for  
118 investigating cellular reprogramming (Takahashi et al. 2007; Ambasudhan et al. 2011), wound-  
119 healing (Li and Wang 2011), fibrosis (Kendall R., et al 2014), and cancer (Kalluri 2016).  
120 Fibroblasts are easy to transfect, proliferate in culture, and exhibit a distinctive spindle-shaped  
121 morphology indicative of their mesenchymal origin, making it an ideal model for cellular  
122 phenotypic screenings. Here, an unbiased selection of lncRNAs expressed in HDF was performed  
123 to choose 285 lncRNAs for functional interrogation (Methods; Supplementary Table S1, Fig. 1a-  
124 c). Using RNA-seq profiling of fractionated RNA we annotated the lncRNA subcellular localization  
125 in the chromatin (35%), nucleus (27%), or cytoplasm (38%) (Fig. 1d). We then designed a  
126 minimum of five non-overlapping antisense oligonucleotides (ASOs) against each lncRNA  
127 (Supplementary Table S2; Fig. 1e) and transfected them individually using an automated cell  
128 culture platform to minimize experimental variability (Fig. 1f).

129

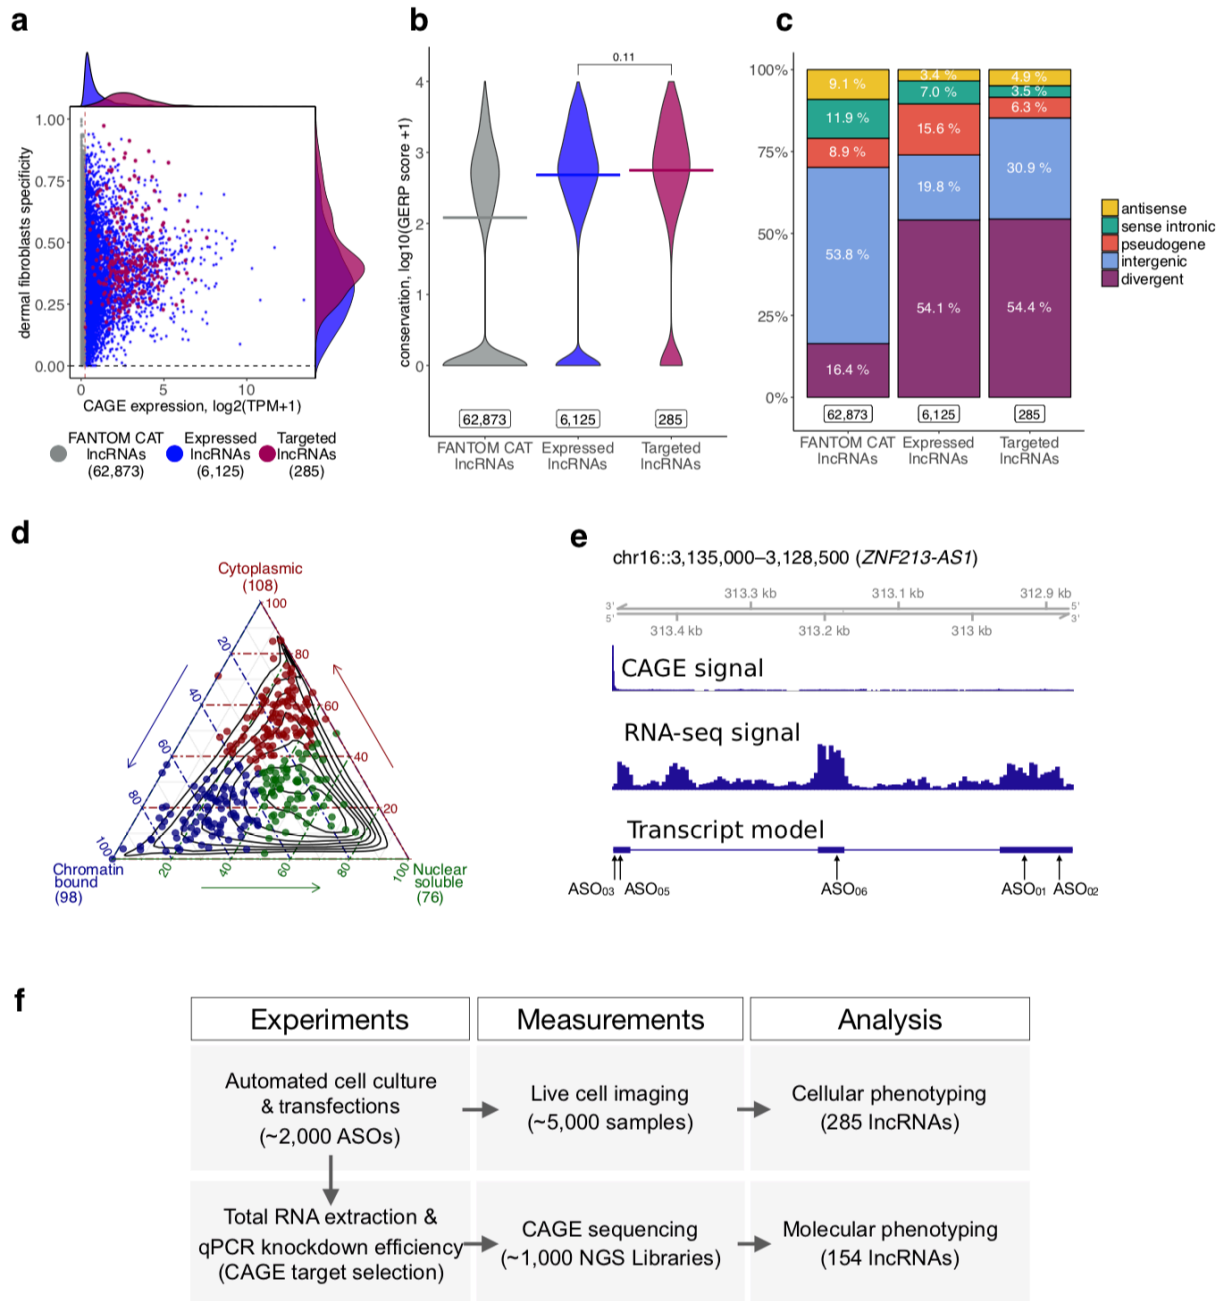

130

131 **Fig. 1: Selection of IncRNA targets and the study overview.** a, CAGE expression levels (TPM tags per million) and

132 human dermal fibroblasts (HDF) specificity (Hon, et al., Nature 2017) of IncRNAs in the FANTOM CAT catalog

133 (n=69,283; grey), IncRNAs expressed in HDFs (n=6,125; blue) and targeted IncRNAs (n=285; red). Dashed vertical

134 line indicates most lowly expressed IncRNA target (~0.2 TPM). b, Gene conservation levels of IncRNAs in the FANTOM

135 CAT catalog IncRNAs (grey), expressed in HDF (blue) and targeted IncRNAs (red). Crossbars indicate the median. No

136 significant difference is observed when comparing targeted and expressed in HDF IncRNAs (Wilcoxon pvalue=0.11).

137 c, Similar to that in b, but for genomic classes of IncRNAs. Most of the targeted IncRNAs and those expressed in HDF

138 are expressed from divergent promoters (Hon, et al., Nature 2017). d, Subcellular localization (based on relative

139 abundances from RNA-seq fractionation data) for targeted IncRNAs. Chromatin-bound (n=98; blue); Nuclear soluble

140 (n=76; green); Cytoplasmic (n=108; red). Black contours represent all lncRNA expressed in HDF. e, Example of  
141 *ZNF213-AS1* loci showing transcript model, CAGE and RNA-seq signal along with targeting ASOs. f, Schematics of  
142 the study.

143

144 Knockdown efficiencies had a median value of 34.6%, and for 27% of ASOs, the efficiencies were  
145 higher than 50% (Supplementary Table S2). Overall, ASOs targeting exons or introns were  
146 equally effective, and knockdown efficiencies were independent of the genomic class, expression  
147 level, and subcellular localization of the lncRNA (Supplementary Fig. 1).

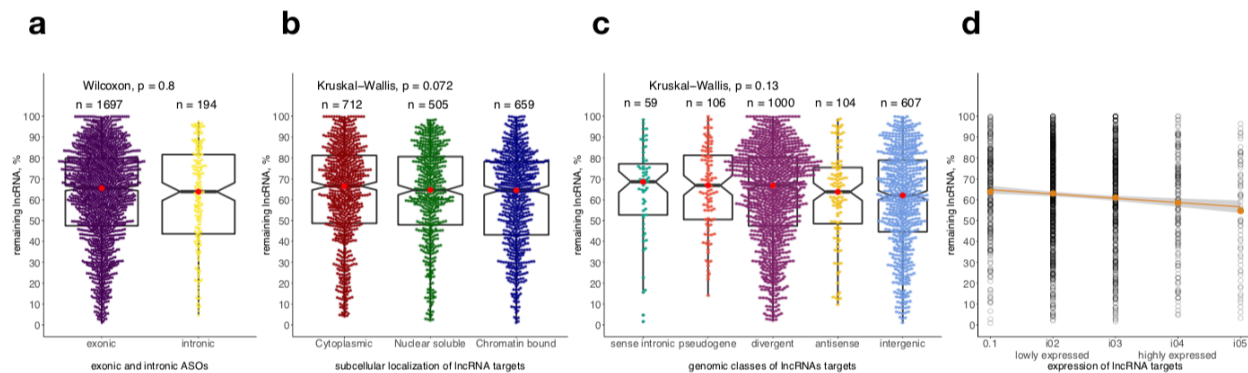

148

149 **Fig.S1: Efficacy of ASOs.** Comparison of knockdown efficiencies: a, for exonic and intronic ASOs. b, across different  
150 subcellular localizations of targeted lncRNAs. c, across different genomic classes of targeted lncRNAs. d, across  
151 expression levels of lncRNAs. In all panels, highest knockdown efficiency from the three primer pairs for a given ASO  
152 is shown. Red dot indicates the median value. Knockdown efficiencies with negative values were not considered.

153

### 154 **A subset of lncRNAs is associated with cell growth and morphology changes**

155 To evaluate the effect of each lncRNA knockdown on cell growth and morphology, we imaged  
156 ASO-transfected HDF in duplicates every 3 hours for a total of 48 hrs (Supplementary Table S3)  
157 and estimated their growth rate based on cell confluence measurements (Fig. 2a,b). 482 out of  
158 2,021 (~23.8%) ASOs showed significant reduction and 20 (~1%) ASOs showed significant  
159 increase in the growth rate (Supplementary Table S3; *Student's* two-sided t-test FDR < 0.05) as  
160 compared to non-targeting controls (Fig. 2c). Different ASOs targeting the same lncRNA typically  
161 had different effects on growth, possibly due to variable knockdown efficiencies, differences in  
162 targeted lncRNA isoforms, as well as off-target effects. Requiring at least two independent ASOs  
163 to consistently impact cell growth, we identified 10/285 (~3.6%) lncRNAs (Supplementary Table  
164 S3; Z-score < -1.645, FDR < 0.05) involved in maintaining cell growth in HDF. Among lncRNAs  
165 with at least 25% reduced growth rate, we selected *A1BG-AS1*, which was previously implicated  
166 in cell growth (Bai et al. 2018), *CATG00000089639*, *RP11-195F19.9*, and *ZNF213-AS1* (Fig. 2d),

167 and validated their growth inhibition by measuring the Ki-67 proliferation protein marker upon  
168 knockdown with siRNAs and selected ASOs (Fig. 2e).

169 In addition to cell growth, we also explored changes in cell morphologies (Fig. 2f). Using a  
170 machine learning-assisted workflow (Methods; Fig. 2g), each cell was segmented and its  
171 morphological features representing various aspects of cell shapes and sizes were quantified  
172 (Carpenter et al. 2006) (Supplementary Table S3). As an example, knockdown of 12/285 lncRNAs  
173 affected the spindle-like morphology of fibroblasts, as indicated by consistent changes in their  
174 observed eccentricity (Z-score < -1.645, FDR < 0.05, at least two ASOs) without reducing the cell  
175 number, suggesting possible cellular transformation towards epithelial-like states. Collectively, we  
176 observed 44/285 lncRNAs (~15.5%) affecting cell growth and/or morphological parameters  
177 (Supplementary Table S3; Fig. 2h).

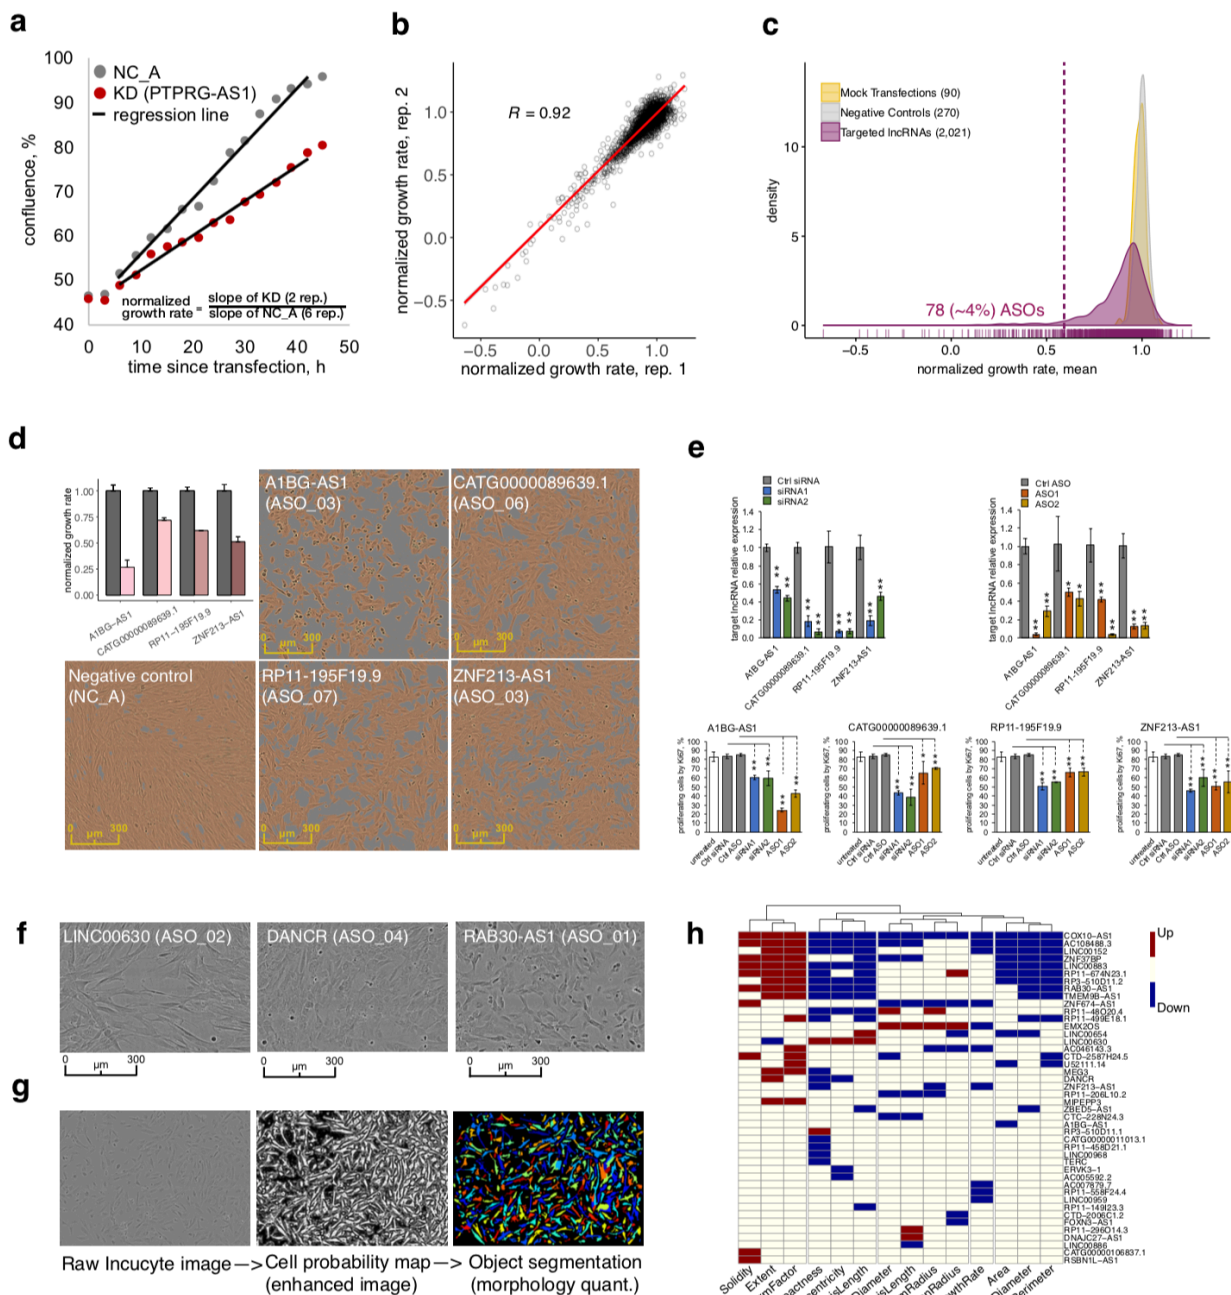

178

179

180

181

182

183

184

185

186

187

**Fig. 2: Cell growth phenotype assessment.** a, Selected example (PTPRG1-AS1) showing the normalized growth rate estimation using NC\_A (negative control). b, Correlation of the normalized growth rate for technical duplicates across 2,456 IncuCyte® samples. c, Density distribution of normalized growth rates (technical replicates were averaged) for 2,021 ASO samples targeting lncRNA (red), 270 negative control (NC\_A) samples (grey) and 90 mock-transfected cells (lipofectamine only) samples (yellow). Dashed vertical line indicates the 78 (~4%) ASOs with significantly reduced normalized growth rate as compared to other targeting ASOs (ZScore<-1.645; fdr<0.05). d, Growth inhibition for selected lncRNA targets (grey bars indicate matched negative control samples) and the corresponding IncuCyte images at 48hrs after transfection. e, Ki67 staining (growth inhibition validation) for selected lncRNA targets after siRNA and ASOs suppression. f, IncuCyte® cell images of a few selected examples of distinct cell



188 morphologies upon the lncRNA knockdown, g, Overview of cell morphology image processing, h, lncRNAs (n=44)  
189 significantly (ZScore<-1.645; fdr<0.05) and consistently (at least two ASOs) reducing growth rate (n=10) or/and  
190 affecting cell morphologies (n=34).

191

## 192 **Molecular phenotyping by CAGE recapitulates cellular phenotypes and highlights** 193 **functions of lncRNAs**

194 To evaluate transcriptome response upon the knockdowns and its agreement with the observed  
195 cellular phenotypes, we next selected 340 ASOs with high knockdown efficiency (mostly greater  
196 than 50%; median 71.4%) and generated and deep-sequenced 970 CAGE libraries to analyze  
197 154 lncRNAs (Fig. 3a; Supplementary Table S4). Differential gene expression analysis revealed  
198 a median of 15 differentially regulated genes, where 61 (~18%) ASOs yielded zero and 108  
199 (~32%) ASOs yielded 100 or more differentially regulated genes (Supplementary Table S5, Fig.  
200 3b). lncRNAs can recruit a regulatory complex to mediate gene regulation in a site-specific  
201 manner (Long et al. 2017)). To test and identify focal regions of lncRNA-mediated regulation, we  
202 profiled differentially regulated CAGE promoters in genomic-clusters. We applied the Clustering  
203 of genomic REgions Analysis Method (CREAM) (Methods; Supplementary Fig2a; Tonekaboni et  
204 al. 2018) and identified linear clusters were significantly more compact than randomly generated  
205 clusters (Supplementary Fig. 2b; Mann-Whitney  $p < 2.2 \times 10^{-16}$ ) thus supporting biological  
206 relevance of the transcriptome response detected by CAGE molecular phenotyping (Shin et al.  
207 2018). Most identified clusters were distal to the genomic locus of the targeted lncRNA,  
208 suggesting a widespread usage of *trans* regulation mechanisms by lncRNAs (Supplementary Fig.  
209 2c).

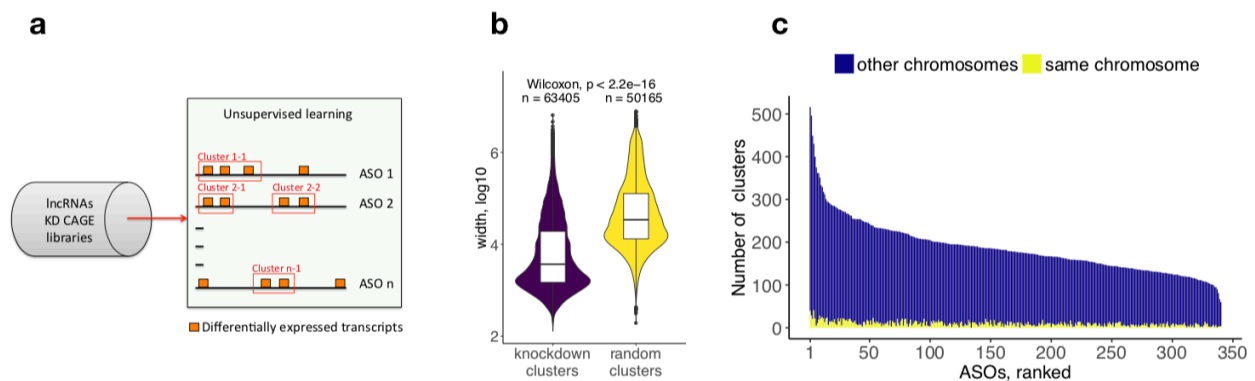

210

211

212 **Fig. S2: Regulation of gene clusters by lncRNA knockdowns.** a, Schematics of finding CORE clusters: differential  
213 transcripts are clustered with CREAM algorithm based on their genomic position. b, Distribution of the CORE clusters  
214 width in the knockdown experiment is narrower than that of clusters generated from randomly generated data. c,

215 Number of CORE clusters and their relative genomic position to the lncRNA target for each ASO knockdown,  
 216 suggesting that lncRNA targets generally affect genes on the same as well as on other chromosomes.

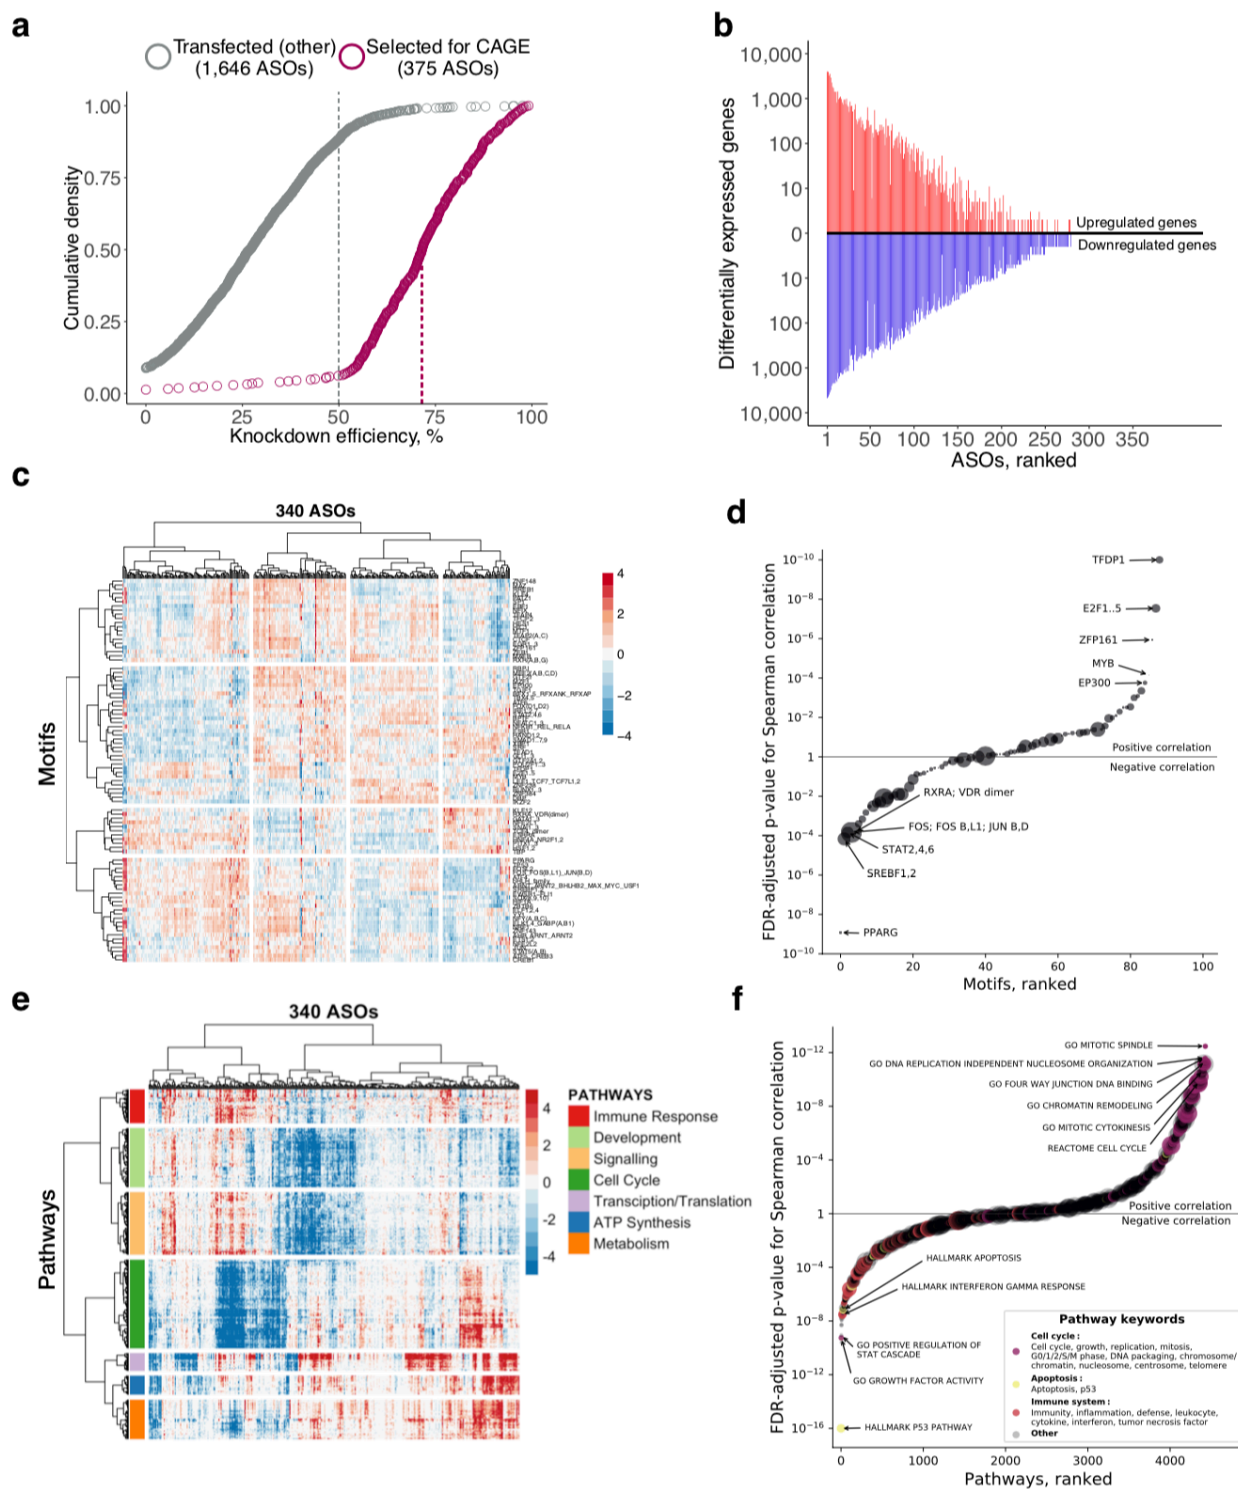

217  
 218 **Fig. 3: CAGE molecular phenotype predicts cellular phenotype.** a, q-PCR knockdown efficiency for 2,021 ASO-  
 219 transfected samples (targeted lncRNAs). Grey dashed line indicates 50% knockdown efficiency generally required for  
 220 CAGE selection. Purple dashed line indicates median knockdown efficiency (71.5%) of ASOs selected for CAGE

221 sequencing. b, Distribution of significantly differentially expressed genes (up-regulated:  $fdr < 0.05$ ,  $ZScore > 1.645$ ,  
222  $\log_2FC > 0.5$  and down-regulated:  $fdr < 0.05$ ,  $ZScore < -1.645$ ,  $\log_2FC < -0.5$ ) across all 340 ASOs. c, Motif Response  
223 Activity Analysis (MARA) across 340 ASOs. Scale indicates ZScore of the relative motif activity, with  $abs(ZScore) > 4$ .  
224 d, Correlation between normalized growth rate and motif activities across 340 ASOs targeting lncRNAs with highlighted  
225 examples. Motifs are scaled based on associated TFs expression in HDF (1 to ~600TPM). e, Enriched biological  
226 pathways across 340 ASOs. Scale indicates GSEA enrichment value calculated as  $-\log_{10}(pvalue) * sign(NES)$ . f, same  
227 as in d, but for selected GSEA pathways. Pathways are scaled based on the number of associated genes.

228

229 Next, to assess the specific molecular pathways affected by individual ASOs, we performed: i)  
230 transcription factor binding site motif activity response analysis (MARA; FANTOM Consortium et  
231 al. 2009) Fig. 3c, ii) gene set enrichment analysis (GSEA; Subramanian et al. 2005; Fig. 3e), and  
232 iii) analysis of FANTOM5 co-expression modules (FANTOM Consortium and the RIKEN PMI and  
233 CLST (DGT) et al. 2014). Transcription factor motifs that promote cell growth (e.g. TFDP1,  
234 E2F1,2,3, and EP300) were positively correlated with the measured cell growth rate while  
235 transcription factor motifs known to inhibit growth or induce apoptosis (e.g. PPARG, SREBPF,  
236 and STAT2,4,6) were negatively correlated (Fig. 3d; Supplementary Fig. 3a; Supplementary  
237 Table S6). Moreover, correlations between GSEA pathways (Fig. 3f; Supplementary Fig. 3b,  
238 Supplementary Table S6) and FANTOM5 co-expression clusters (FANTOM Consortium and the  
239 RIKEN PMI and CLST (DGT) et al. 2014); Supplementary Fig. 3c) showed that cell growth and  
240 replication related pathways were positively correlated with the measured growth rate, whereas  
241 those related to immunity, cell stress and cell death were negatively correlated. Additionally,  
242 morphological changes were reflected in the molecular phenotype assessed by CAGE  
243 (Supplementary Fig. 3d). Cell radius and axis length were associated with GSEA categories  
244 related to actin arrangement and cilia, while cell compactness was negatively correlated with  
245 apoptosis. The extensive molecular phenotyping analysis also revealed pathways not explicitly  
246 associated with cell growth and cell morphology, such as transcription, translation, metabolism,  
247 development and signaling (Fig. 3e).

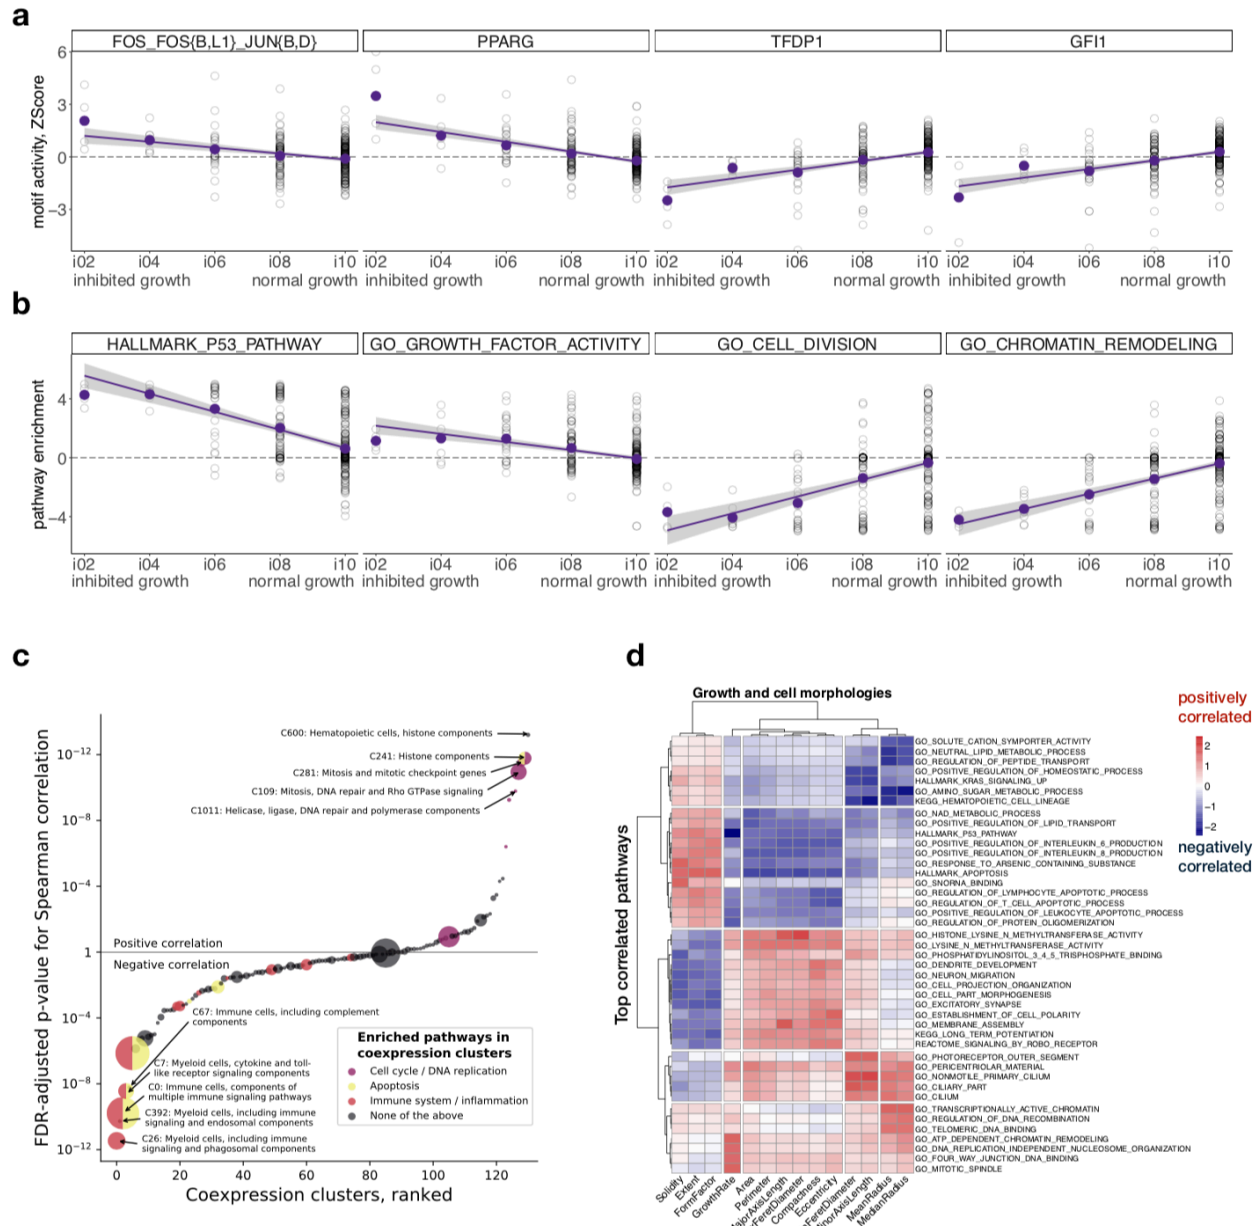

248

249 **Fig. S3: Correlations with cell growth and morphologies.** A, Correlations of selected transcription factor binding

250 motifs activity with the normalized growth rate across 340 ASOs targeting lncRNAs. Each hollow circle represents a

251 single ASO. b, Same as in a, but for selected GSEA pathways. c, Global correlations of FANTOM 5 co-expression

252 clusters enrichment with growth phenotype. d, Top three significant GSEA pathways positively and negatively

253 correlated with the normalized growth rate and 13 cell morphologies. Scale indicates FDR-adjusted p value for

254 Spearman correlation re-scaled through each morphology.

255

256 Analyzing 119 lncRNAs targeted by at least two independent ASOs revealed that the

257 transcriptome response was more concordant for distinct ASOs targeting the same lncRNA than

258 for ASOs targeting different lncRNAs (Supplementary Fig. 4a). We found 20, 18, and 36 lncRNAs

259 significantly and consistently changed gene expression, motif activity and biological pathways,  
 260 respectively (Methods; Supplementary Table S5; Supplementary Fig. 4b). In total, the molecular  
 261 phenotype was affected upon knockdown of 52/119 (43.7%) lncRNAs in human dermal fibroblasts  
 262 (Supplementary Fig. 4c).

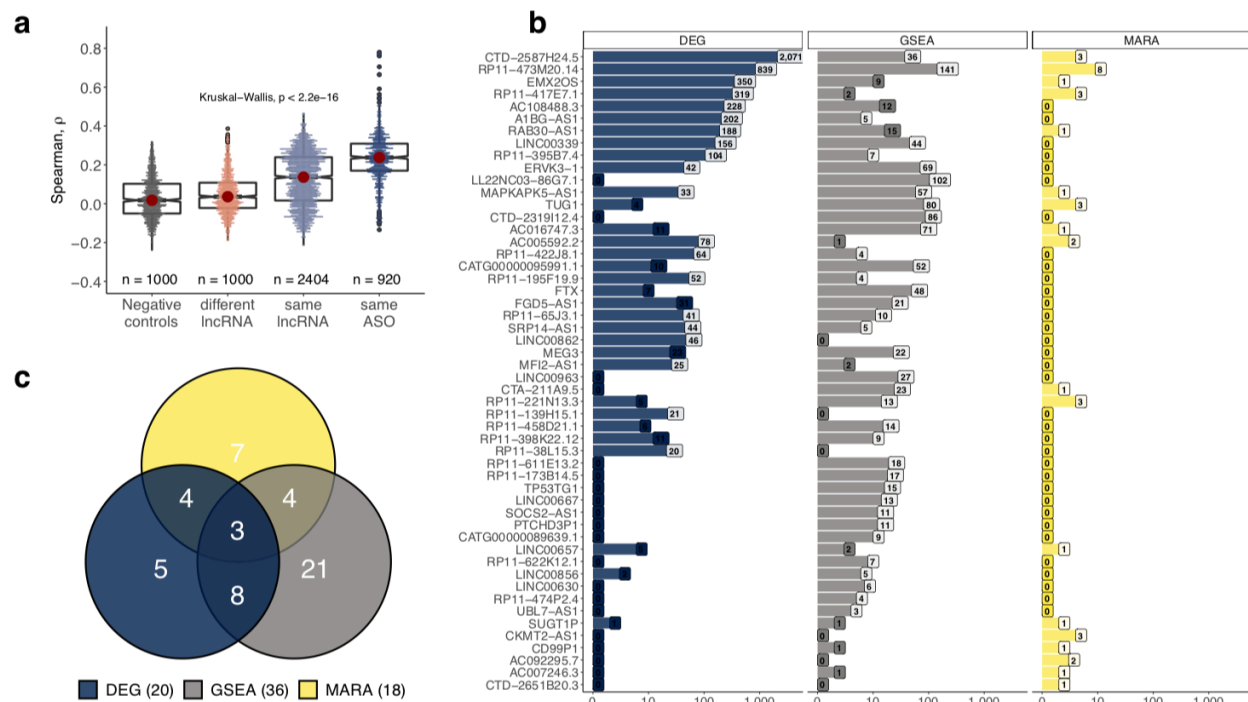

263  
 264  
 265 **Fig. S4: Concordant functional response of lncRNAs.** a, Pairwise correlations for CAGE libraries across: 1,000  
 266 randomly selected different lncRNAs comparisons, same lncRNAs (different ASOs), same ASOs (duplicates) and 1,000  
 267 randomly selected pairwise negative control comparisons. For each data point, the correlations are calculated taking  
 268 all genes > 1TPM and dividing their expression by their average expression in all 143 negative controls. b, 52 lncRNA  
 269 targets that in at least one functional category (DEG, GSEA, MARA) show a significant consistent response (in at least  
 270 2 ASOs) and above generated matched random background (Methods). The significant lncRNA targets in each  
 271 category (light bar tip) are summarized in c.

272  
 273 **Promoter usage and architecture modulated by lncRNA knockdown**

274 Precise mapping of transcription start sites (TSS) with CAGE previously revealed usage of  
 275 alternative promoters and architecture diversities mediated by either TATA or CpG transcriptional  
 276 machineries (Carninci et al. 2006; Kim et al. 2005; Haberle et al. 2014; Garieri et al. 2017).  
 277 Promoter switching (changes in the *relative* expression between a given pair of promoters of the  
 278 same gene) suggest that lncRNAs might direct RNA polymerase II to alternative initiation sites  
 279 (Garieri et al. 2017) resulting in different gene isoforms. To test whether we can define regulatory  
 280 roles of lncRNAs based on the relative TSS activities in multi-promoter genes, we measured

281 knockdown-mediated promoter switching events, which occasionally lead to the change of the  
 282 dominant promoter (Fig. 4a-c). For 28 out of 119 lncRNAs, we found 2,699 consistent switching  
 283 events (Supplementary Table S7) in 17.8% (1,276 out of 7,161) actively transcribed multiple-  
 284 promoter genes (Fig. 4d). The highest number of these events (n=1,159) was found for *CTD-*  
 285 *2587H24.5* (ENSG00000267577) reported to be a "transcribed enhancer" and a hub in the  
 286 chromatin interaction map in K562 cells (Thiel et al. 2018). Knockdown of five other lncRNAs:  
 287 *AC013394.2*, *RP11-417E7.1*, *EMX2OS*, *ZNF213-AS1*, *RAB30-AS1* resulted in 100 or more  
 288 promoter switching events (Fig. 4d).

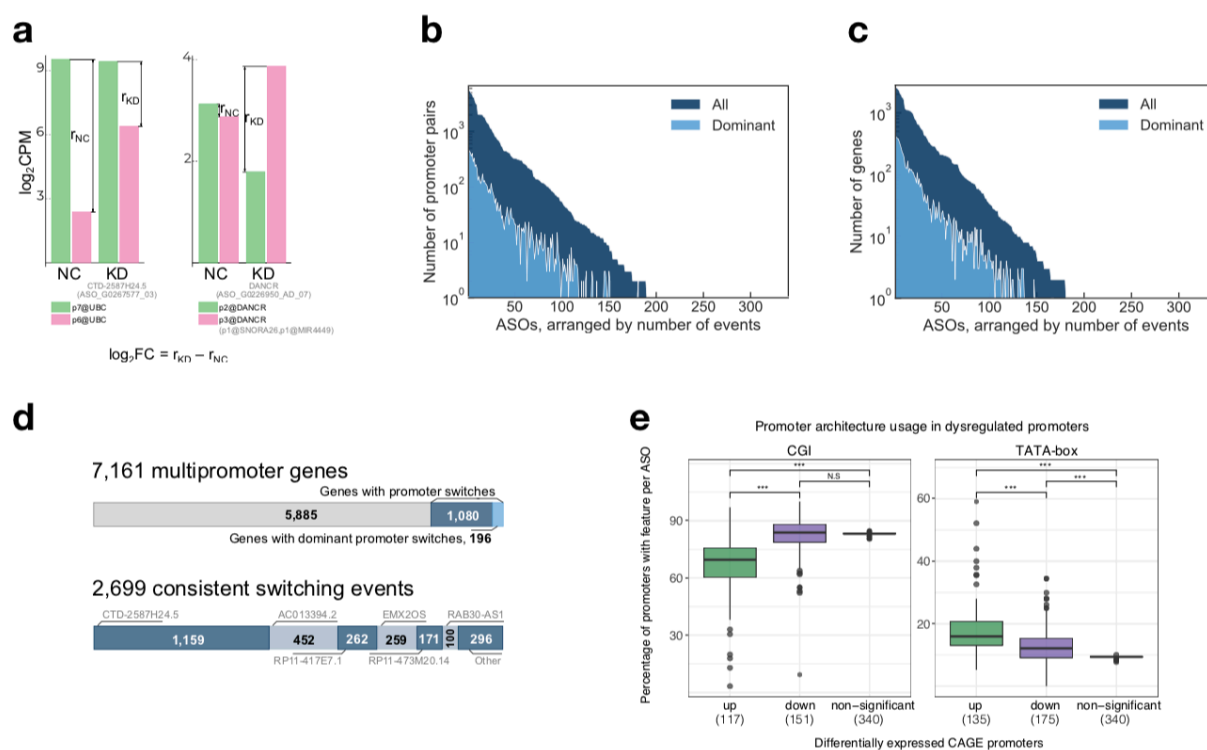

289

290 **Fig. 4: Knockdown-mediated promoter usage and architecture.** a, Selected example of a promoter switching event  
 291 in the *UBC* gene upon the knockdown of *CTD-2587H24.5* lncRNA (left) and of the dominant promoter switching in  
 292 *DANCR* upon its own knockdown (right). b, Number of significant promoter pair switching events ( $\text{abs}(\log_2 \text{FC}) > 0.5$ ;  
 293  $\text{FDR} < 0.05$ ;  $\text{abs}(\text{ZScore}) > 1.645$ ) across all 340 ASOs, with switchings of the dominant promoter highlighted (light  
 294 blue). c, 28 out of 119 lncRNA show 2,699 significant and consistent (in at least two ASOs) promoter switching events  
 295 affecting 1,276 out of 7,161 expressed multipromoter genes. 196 of these resulted in switching of the dominant  
 296 promoter (light blue). d, 2,699 consistent and significant switching events with most prominent lncRNA targets (out of  
 297 28 lncRNA targets showing consistent switching) highlighted. e, Up- and down-regulated CAGE promoters with CGI  
 298 and TATA-box architectures compared to the background (all non-significantly deregulated promoters). Each data point  
 299 represents a single ASO experiment with at least 20 promoters differentially expressed ( $\text{abs}(\log_2 \text{FC}) > 0.5$ ;  $\text{FDR} <$   
 300  $0.05$ ;  $\text{ZScore} > 1.645$ ) in a given category.

301

302 Promoter architecture is indicative of gene regulatory machineries with sharp transcription  
303 initiation peaks associated with TATA-box promoters, while broad distributions of transcription  
304 initiation are found in CpG island (CGI) regions. Also, TATA-boxes are often found in promoters  
305 of tissue-specific genes and they are absent in most housekeeping genes (Sandelin et al. 2007).  
306 Thus, the enrichment of TATA-box promoter usage upon knockdown suggest that lncRNAs may  
307 modulate regulatory machineries that govern cell- and pathway-specific promoters and elicit cell-  
308 specific function (Haberle et al. 2014). To assess which lncRNAs influence function in a cell-  
309 specific manner, we quantified the changes in TATA-box and CGI architecture at differentially  
310 regulated promoters and assessed significance for each ASO knockdown (Methods;  
311 Supplementary Table S8). Differentially expressed promoters were more likely to have a TATA-  
312 box both in case of upregulation (two sample Student t-test p-value  $< 2.2 \times 10^{-16}$ ) and  
313 downregulation (two sample Student t-test p-value =  $1.3 \times 10^{-16}$ ; Fig. 4e). For example, 20-35%  
314 of promoters upregulated upon knockdown of *LINC01615*, *RNASEH1-AS1*, *RP11-221N13.3*  
315 contained a TATA-box, compared to the 10% of unchanged promoters (Supplementary Fig. 5a,b),  
316 and for *RP11-221N13.3*, additionally, 23-25% of the down-regulated promoters had a TATA-box  
317 architecture (Supplementary Fig. 5b). In contrast, CGI architecture was significantly  
318 underrepresented in upregulated promoters only (stratified sampling p value  $< 2.2 \times 10^{-16}$ ; Fig.  
319 4e). Knockdown of *FGD5-AS1*, for example, showed ~60-70% depletion in two out of three ASOs  
320 as compared to the ~80% of CGI in the background promoters (Supplementary Fig. 5c).

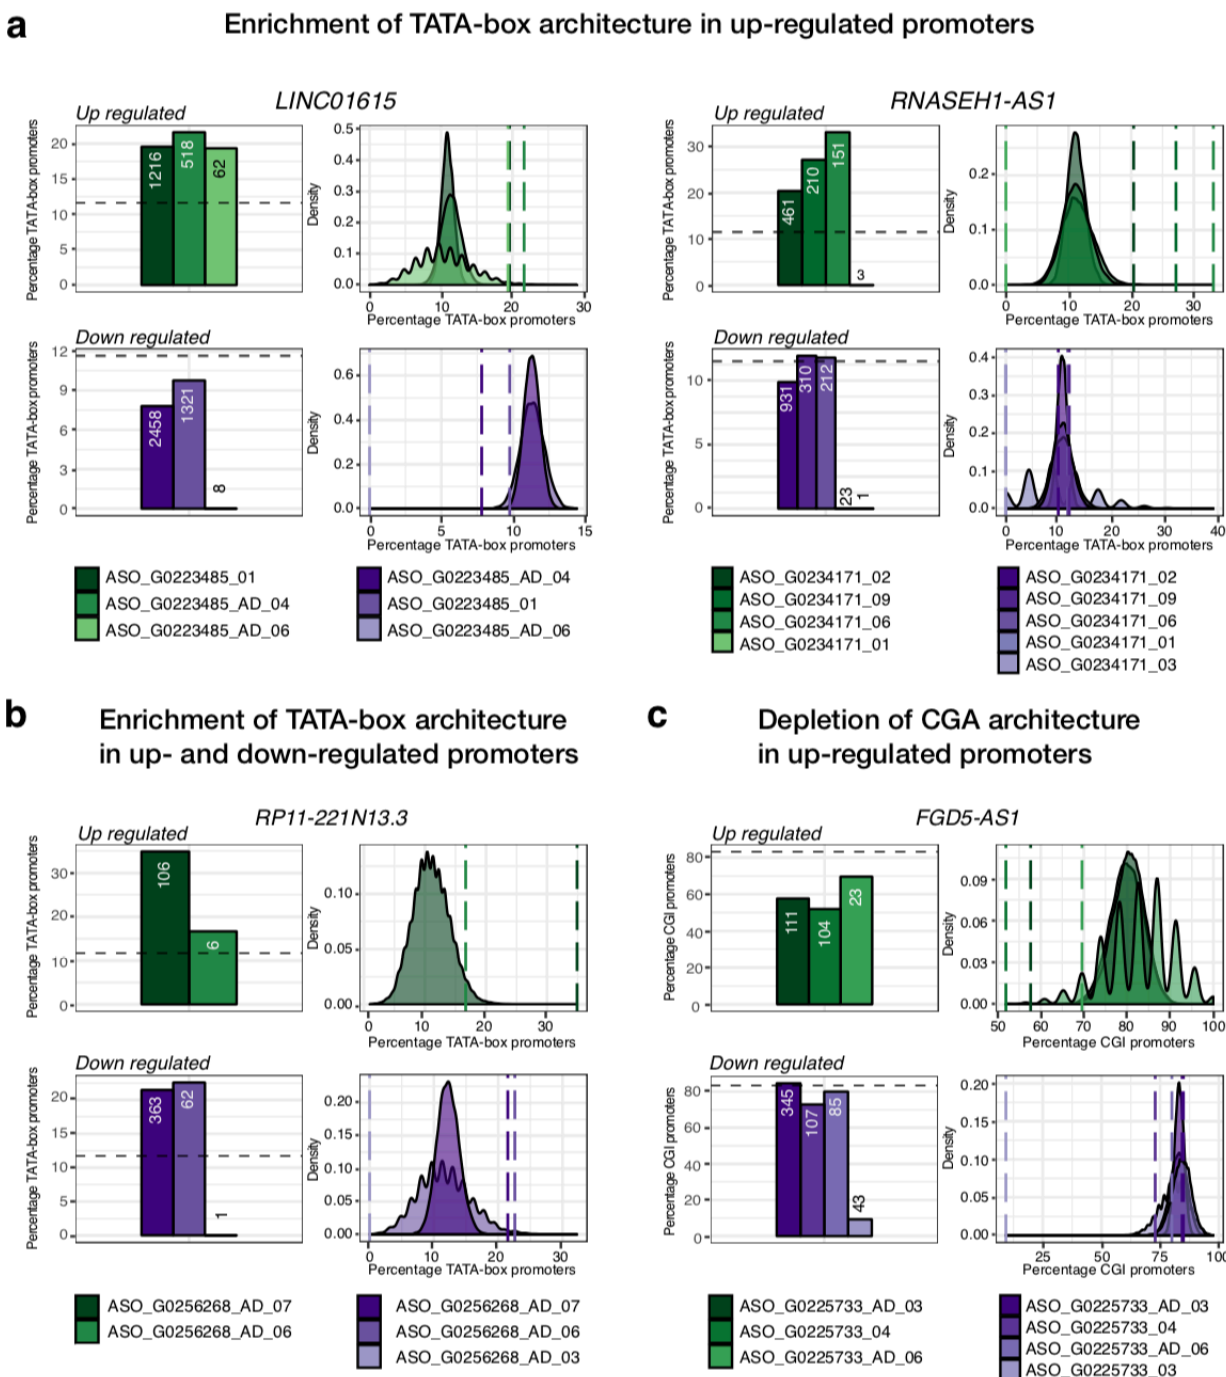

321  
 322 **Fig. S5: Promoter architecture usage.** a, Selected lncRNAs with significantly up regulated TATA-box promoters. b,  
 323 Significantly up and down regulated TATA-box promoters. c, Significantly upregulated CGA promoters. In all panels,  
 324 barplots (left) show the percentage of TATA-box or CGI promoters in a given ASO and the numbers represent the  
 325 number of differentially expressed promoters. The density plots (right) show the distribution of the stratified random  
 326 sampling (10,000 times) for the same number of promoters. The dotted lines indicate observed percentage for each  
 327 ASO. The smaller the number of genes randomly sampled, the more discontinuous density distribution.

328



329 ***ZNF213-AS1* is associated with cell growth and migration.**

330 As an example of an lncRNA associated with cell growth and morphology (Fig. 2h) we further  
331 analyzed *ZNF213-AS1* (*RP11-473M20.14*). This lncRNA is highly conserved in placental  
332 mammals, moderately expressed (~8 CAGE tags per million) in HDF and enriched in the  
333 chromatin. Four distinct ASOs (ASO\_01, ASO\_02, ASO\_05, and ASO\_06) strongly suppressed  
334 expression of *ZNF213-AS1*, while expression of the *ZNF213* sense gene was not significantly  
335 affected in any of the knockdowns. The four ASOs caused varying degrees of cell growth inhibition  
336 (Fig. 5a). ASO\_01 and ASO\_06 showed a reduction in cell number, as well as an upregulation of  
337 apoptosis, immune and defense pathways in GSEA suggesting cell death. While cell growth  
338 inhibition observed for ASO\_02 and ASO\_05 was confirmed by Ki-67 marker staining (Fig. 2e),  
339 the molecular phenotype revealed suppression of GSEA pathways related to cell growth, as well  
340 as to cell proliferation, motility, and extracellular structure organization (Fig. 5b), and consistent  
341 in two ASOs downregulation of related motifs, for example, *EGR1*, *EP300*, *SMAD1..7,9* (Phan et  
342 al. 2004) (Fig. 5c). For data exploration, <http://fantom.gsc.riken.jp/zenbu/reports/>  
343 As cell motility pathways were affected by the knockdown, we tested whether *ZNF213-AS1* could  
344 influence cell migration. Using wound closure (scratch) assays with transient cell growth inhibition  
345 (pre-incubation with mitomycin-C and serum starvation) on the transfected cells, we observed a  
346 substantial reduction of wound closure rate (~40% over a 24-hour period) in the *ZNF213-AS1*  
347 depleted HDFs (Fig. 5d). The reduced wound healing rate should thus mainly reflect reduced cell  
348 motility, further confirming affected motility pathways predicted by the molecular phenotype.

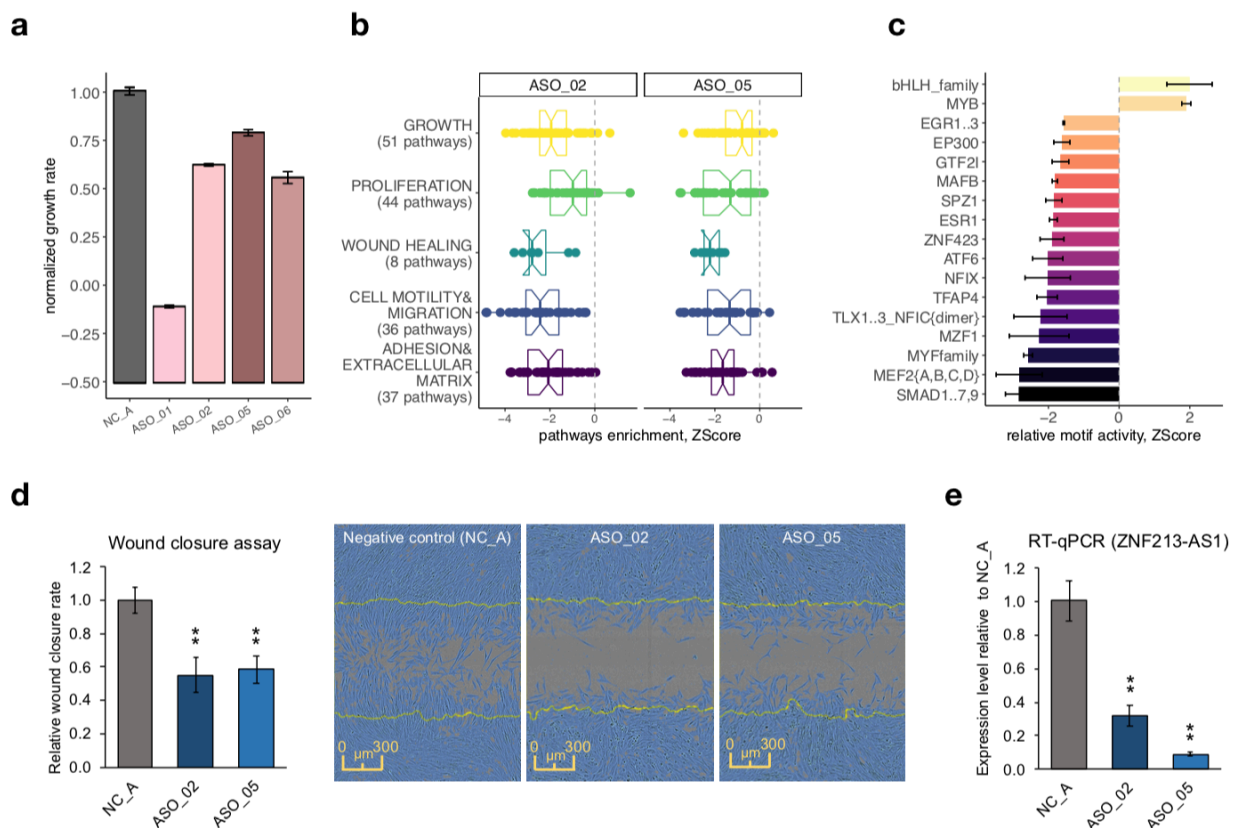

349  
 350 **Fig. 5: *ZNF213-AS1* regulates cell growth, migration and proliferation.** a, Normalized growth rate across four  
 351 distinct ASOs (in duplicates) targeting *ZNF213-AS1* as compared to six negative control samples (shown in grey). b,  
 352 Enrichment of biological pathways associated with growth, proliferation, wound healing, migration and adhesion for  
 353 ASO\_02 and ASO\_05. c, Down- and up-regulated binding motifs including examples of those for transcription factors  
 354 known to modulate growth, migration and proliferation (EGR family, EP300, GTF2I). d, Relative wound closure rate  
 355 calculated during the 20 hrs post scratching and the representative images of wound closure assay at 20hrs shows 40-  
 356 45% reduction for the two targeting ASOs (ASO\_02 and ASO\_05; both in duplicates) as compared to six negative  
 357 controls samples (shown in grey). e, Knockdown efficiency measured by RT-qPCR after wound closure assay (72 hrs  
 358 post transfection) showing strong sustained suppression (65-90%) of *ZNF213-AS1*.

359  
 360 As these results indicated a potential role of *ZNF213-AS1* in cell growth and migration, we used  
 361 FANTOM CAT Recount 2 atlas (co-submitted to *Genome Research*, GENOME/2019/254656,  
 362 Imada et al. 2018), which incorporates the TCGA dataset (Collado-Torres et al. 2017), and found  
 363 relatively higher expression of *ZNF213-AS1* in acute myeloid leukemia (LAML) and in low grade  
 364 gliomas (LGG) as compared to other cancers (Supplementary Fig. 6a). In LAML, the highest  
 365 expression levels were associated with mostly undifferentiated states, whereas in LGG, elevated  
 366 expression levels were found in oligodendrogliomas, astrocytomas, and in IDH1 mutated tumors,  
 367 suggesting that *ZNF213-AS1* is involved in modulating differentiation and proliferation of tumors

368 (Supplementary Fig. 6b-e). Further, univariate Cox proportional hazard analysis as well as  
 369 Kaplan-Meier curves for LGG were significant and consistent with our findings (HR = 0.61, BH  
 370 FDR = 0.0079). The same survival analysis on LAML showed weak association with poor  
 371 prognostic outcome but the results were not significant (Supplementary Fig. 6f,g).

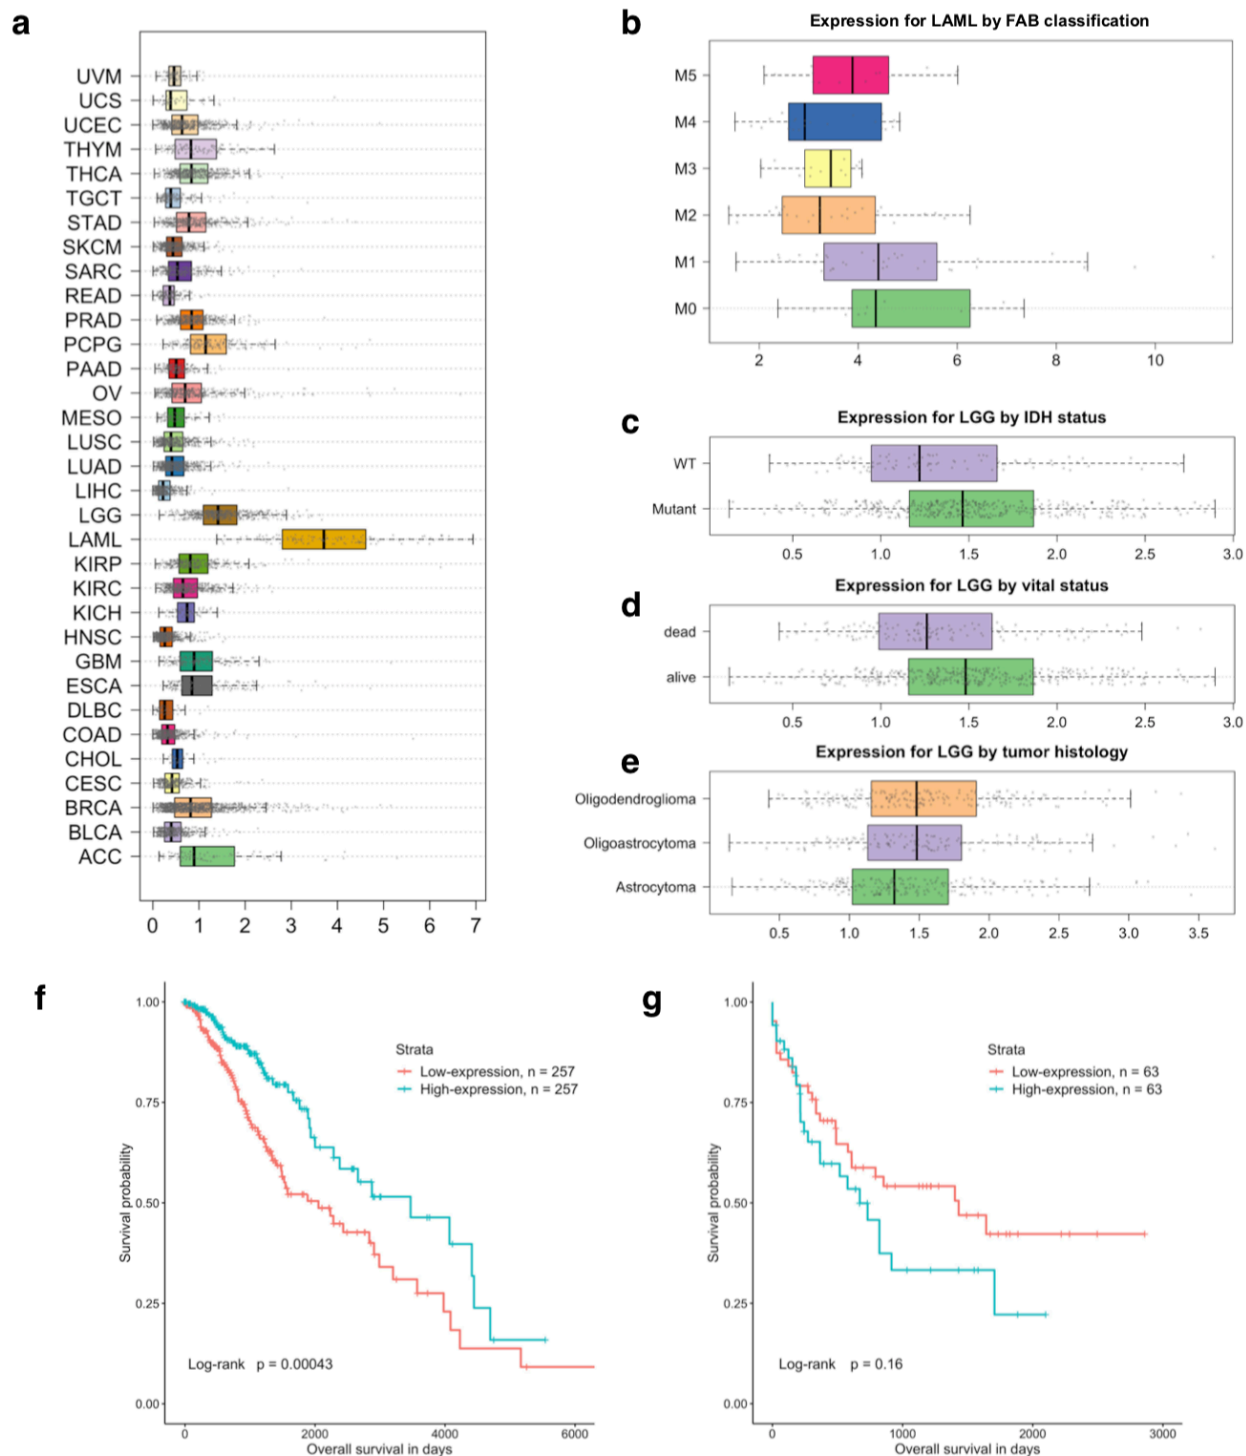

372

373 **Fig. S6: Involvement of ZNF213-AS1 in cancer.** a, Expression of ZNF213-AS1 in TCGA b, Expression of ZNF213-  
374 AS1 for Acute Myeloid Leukemia (LAML) by French-American-British classification. The levels are higher in M0 and  
375 M1 subtypes. These subtypes are considered the most undifferentiated stages of LAML. Since ZNF213-AS1 shows  
376 the lowest expression level in blood cells (GTEx), the higher level of expression could be suggestive of dysregulation  
377 of its expression in undifferentiated stages or involvement in early precursor of blood cells. c, Expression of ZNF213-  
378 AS1 in Low Grade Glioma (LGG) by tumor histology classification. Oligodendrocyte differentiation is related to good  
379 prognosis in this cancer type. d, Expression of ZNF213-AS1 in LGG by tumor IDH (isocitrate dehydrogenase) mutational  
380 status. A total of 511 samples with mutational information were available, 417 of them were classified as "Mutant" and  
381 94 as "wild type". IDH mutation has been repeatedly associated with better prognosis than wild type in gliomas. e,  
382 Expression of ZNF213-AS1 by patients' vital status. The number of alive patients is 387 from the total of 513 available  
383 in the follow-up. Univariate Cox proportional hazard analysis as well as Kaplan-Meier curves for: f, LGG (HR: 0.61,  
384 FDR: 0.0079) g, LAML (HR: 1.32; FDR: 0.5455)

385

### 386 ***RP11-398K22.12 (KHDC3L-2) regulates KCNQ5 in cis***

387 Besides primarily observing in *trans* regulation in our knockdown data, several lncRNAs were  
388 previously shown to also regulate the expression in *cis* (Joung et al. 2017). Herein, we  
389 investigated in detail *RP11-398K22.12* (ENSG00000229852) where the knockdowns by two  
390 independent ASOs (ASO\_03, ASO\_05) successfully reduced the expression of the target lncRNA  
391 (67-82% knockdown efficiency, respectively) and further downregulated its neighboring genes,  
392 *KCNQ5* and its divergent partner novel lncRNA *CATG00000088862.1* (Fig. 6a). While the two  
393 genomic loci occupy chromosome 6 and are 650 kb away, Hi-C analysis showed that they are  
394 located within the same topologically associated domain (TAD) and spatially co-localized (Fig.  
395 6b). Moreover, chromatin-enrichment and single molecule RNA-FISH of *RP11-398K22.12* (Fig.  
396 6c) suggested its highly localized *cis*-regulatory role.

397

398 In FANTOM5 (Hon et al. 2017), expression of *RP11-398K22.12*, *KCNQ5* and  
399 *CATG00000088862.1* was enriched in brain and nervous system samples, while GTEx (GTEx  
400 Consortium 2015) showed highly specific expression in brain tissues, particularly in the  
401 cerebellum and the cerebellar hemisphere (Fig. 6d). GTEx data also showed that expression of  
402 *RP11-398K22.12* with *KCNQ5* and *CATG00000088862.1* was highly correlated across neuronal  
403 tissues (Fig. 6e,f), with the exception of cerebellum and cerebellar hemisphere, potentially due to  
404 relatively lower levels of *KCNQ5* and *CATG00000088862.1* while levels of *RP11-398K22.12*  
405 remained relatively higher. Additionally, we found an eQTL SNP (rs14526472) overlapping with  
406 *RP11-398K22.12* and regulating expression of *KCNQ5* in brain caudate ( $p = 4.2 \times 10^{-6}$ ; normalized  
407 effect size -0.58). All these findings indicate that *RP11-398K22.12* is implicated in the nervous

408 system by maintaining the expression of *KCNQ5* and *CATG0000088862.1* in a *cis*-acting  
 409 manner.

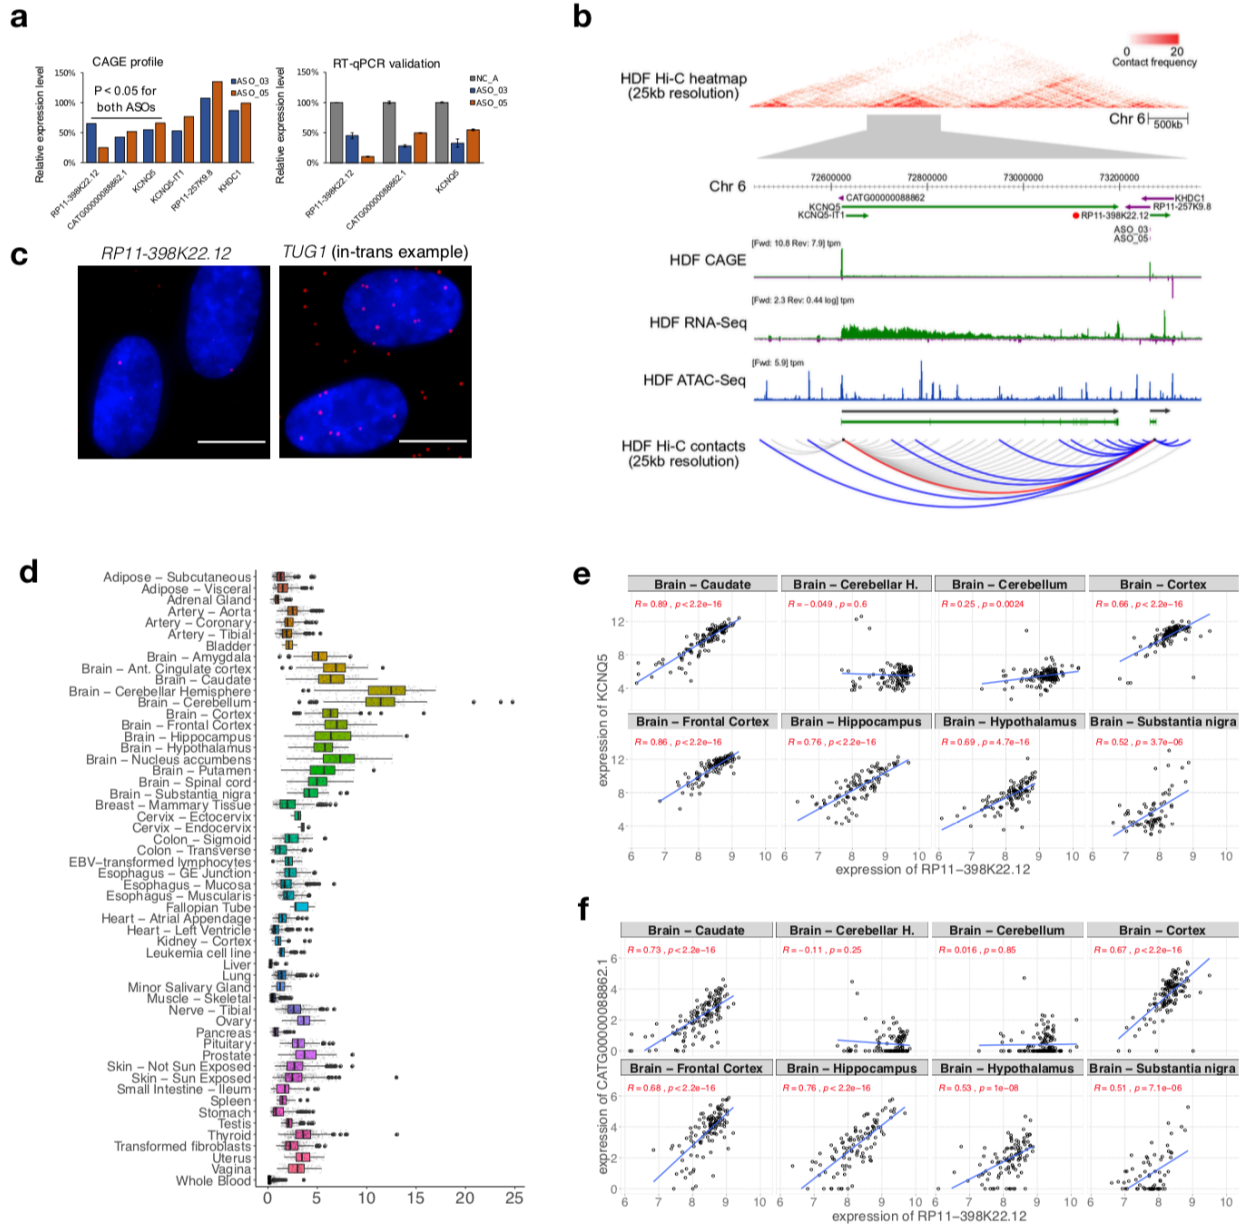

410  
 411 **Fig. 6. RP11-398K22.12 mediates the down-regulation of KCNQ5 in cis.** a, Changes in expression levels of genes  
 412 shown by HiC analysis to be in the same topologically associated domain (TAD) as *RP11-398K22.12*. Both *KCNQ5*  
 413 and *CATG0000088862.1* are down-regulated (pvalue < 0.05) upon the knockdown of *RP11-398K22.12* with two  
 414 independent ASOs (left) as further confirmed with RT-qPCR (right). b, (top) Representation of the chromatin  
 415 conformation in the 4Mb region proximal to the TAD containing *RP11-398K22.12*, followed by the locus gene  
 416 annotation, CAGE, RNA-Seq and ATAC-Seq data for native HDFs. (bottom) Schematic diagram showing Hi-C  
 417 predicted contacts of *RP11-398K22.12* (blue) and *KCNQ5* (grey) (25Kb resolution, frequency  $\geq 5$ ) in HDF cells. Red  
 418 line indicates *RP11-398K22.12* and *KCNQ5* contact. c, FISH image for *RP11-398K22.12* suggesting proximal  
 419 regulation. *TUG1* FISH image (suggesting trans regulation) is included for comparison; (bar = 10  $\mu$ m). d, GTEx atlas

420 shows relatively high expression of *RP11-398K22.12* in brain samples. e, Correlation of *RP11-398K22.12* and *KCNQ5*  
421 in eight distinct brain regions. F, Correlation of *RP11-398K22.12* and *CATG00000088862.1* in eight distinct brain  
422 regions.

423

## 424 **Discussion**

425 This study systematically annotates lncRNAs through molecular and cellular phenotyping by  
426 selecting 285 lncRNAs from human dermal fibroblasts across a wide spectrum of expression,  
427 conservation levels and subcellular localization enrichments. Importantly, using ASO technology  
428 allowed observed phenotypes to be associated to the lncRNA transcripts, while in contrast  
429 CRISPR-based approaches may synchronically influence the transcription machinery at the site  
430 of the divergent promoter or affect regulatory elements of the targeted DNA site. Knockdown  
431 efficiencies obtained with ASOs were observed to be independent of lncRNA expression levels,  
432 subcellular localization, and of their genomic annotation, allowing us to apply the same  
433 knockdown technology to various classes of lncRNAs.

434

435 We investigated the *cis* regulation of nearby divergent promoters, which has been reported as  
436 one of the functional roles of lncRNA (Luo et al. 2016). However, in agreement with previous  
437 studies (Guttman et al. 2011) we did not observe general patterns in the expression response of  
438 divergent promoters. Recent studies suggest that transcription of lncRNA loci that do not overlap  
439 with other transcription unit may influence RNA polymerase II occupancy on neighboring  
440 promoters and gene bodies (Engreitz, Haines, et al. 2016, Cho et al. 2018). Thus, it is plausible  
441 that transcription of targeted lncRNA was maintained, despite suppression of mature or nascent  
442 transcripts using ASOs. This further suggests that the functional responses described in this study  
443 are due to interference of processed transcripts present either in the nucleus, the cytoplasm or  
444 both. While it is arguable that ASOs may interfere with general transcription by targeting the 5'-  
445 end of nascent transcripts and thus releasing RNA polymerase II followed by exonuclease-  
446 mediated decay and transcription termination (aka "torpedo model"; (Proudfoot 2016)), most of  
447 the ASOs were designed across the entire length of the transcript. Since we did not broadly  
448 observe dysregulation in nearby genes, interference of transcription or splicing activity is less  
449 likely to occur.

450

451 We observed a reduction in cell growth for ~3.6% of our target lncRNA genes, which is in-line  
452 with previous experiments using CRISPRi-pooled screening, which reported 5.9% (in iPS cells)  
453 of lncRNAs exhibiting a cell growth phenotype (Liu et al. 2017). While these rates are much lower

454 than for protein-coding genes (Sokolova et al. 2017), recurrent observations of cell growth  
455 (including cell death) phenotypes strongly suggest that a substantial fraction of lncRNAs play an  
456 essential role in cellular physiology and viability.

457

458 Several lncRNAs such as *MALAT1*, *NEAT1*, and *FIRRE* have been reported to orchestrate  
459 transcription, RNA processing, and gene expression (Kopp and Mendell 2018), but are not  
460 essential for mouse development or viability. These observations advocate for assays that can  
461 comprehensively profile the molecular changes inside perturbed cells. Therefore, in contrast to  
462 cell-based assays, functional elucidation via molecular phenotyping provides comprehensive  
463 information that cannot be captured by a single phenotypic assay. Herein, differential gene  
464 expression analysis, GSEA (affected pathways) and MARA (changes in transcription factors  
465 binding activity) indicated that 43.7% of lncRNAs exert a regulatory function in HDF. However,  
466 lncRNA targets that did not exhibit a molecular phenotype may be biologically relevant in other  
467 cell types or cell states (Li and Chang 2014; Liu et al. 2017). At the same time, our results showed  
468 that particular lncRNAs expressed broadly in other tissues (e.g., in the human brain) were  
469 functional in HDF (in case of *RP11-398K22.12*), suggesting that lncRNAs may be functionally  
470 relevant across multiple tissues in spite of the cell-type-specific expression of lncRNAs.

471

472 An increasing number of studies suggests that lncRNAs regulate gene expression in *trans* via  
473 interaction with chromatin-modifying complexes such as PRC2 (Rinn et al. 2007) or independent  
474 of PRC2 (Portoso et al. 2017) by directly binding to DNA (triplex; (Mondal et al. 2015) or other  
475 RNA binding proteins (Tichon et al. 2016). Analysis of cellular localization by fractionation followed  
476 by RNA-seq and *in situ* hybridization can indicate whether an lncRNA may act *in trans* by  
477 quantifying its abundance in the nuclear soluble fraction as compared to cytoplasm. While most  
478 lncRNAs in nuclear soluble fraction affected pathways associated with chromatin modification,  
479 additional experiments to globally understand their interaction partners will elucidate the  
480 molecular mechanism behind *trans*-acting lncRNAs (Li et al. 2017; Sridhar et al. 2017; companion  
481 paper).

482

483 In summary, our study demonstrates that lncRNAs elicit gene regulation largely *in trans* by  
484 regulating the transcriptional machinery for gene activation and repression. These results  
485 highlight the functional importance of lncRNAs regardless of their expression, localization and  
486 conservation levels. Molecular phenotyping is a powerful platform to reveal the functional  
487 relevance of lncRNAs that cannot be observed based on the cellular phenotypes alone. With

488 additional molecular profiling techniques, such as RNA duplex maps in living cells to decode  
489 common structural motifs (Lu et al. 2016) and Oxford Nanopore Technology (ONT) to annotate  
490 the full-length variant isoforms of lncRNA (Hardwick et al. 2019), structure-to-functional  
491 relationship of lncRNAs may be elucidated further in the future. Data and analysis for this study  
492 is made available at <http://fantom.gsc.riken.jp/zenbu/reports/#FANTOM6>



## 493 **Online Methods**

### 494 Gene Models and lncRNA targets selections

495 The gene models used in this study were primarily based on the FANTOM CAGE-associated  
496 transcriptome (CAT) at permissive level as defined previously (Hon et al. 2017), with additional  
497 *de novo* transcript models constructed from human dermal fibroblasts (HDFs) and induced  
498 pluripotent stem cells (iPSCs) RNA sequencing data. In brief, CAGE sequencing was performed  
499 on the total RNA, and RNA-Seq was performed on ribosomal-RNA depleted RNA, from HDFs  
500 and iPSCs (as described elsewhere). CAGE and RNA-Seq reads were mapped onto hg19 using  
501 Tophat2 with default parameters. RNA-Seq reads were *de novo* assembled for each cell line using  
502 Cufflinks as described previously (Hon et al. 2017) and the transcript models with their 5'ends  
503 supported by CAGE reads were retained. lncRNA genes were identified from these retained  
504 transcript models as previously described (Hon et al. 2017). The novel lncRNA genes (i.e. loci  
505 non-overlapping with FANTOM CAT) were merged with the permissive FANTOM CAT, and the  
506 merged assembly were lifted over (Hinrichs et al. 2006) from hg19 to hg38.

507 From this merged assembly, we selected lncRNA knockdown targets in an unbiased manner to  
508 broadly cover various types of lncRNAs. Briefly, we first identified a list of the lncRNA genes  
509 expressed in HDF, with RNA-Seq expression at least 0.5 fragments per kilobase per million and  
510 CAGE expression at least 1 tag per millions. Then we manually inspected each lncRNA locus in  
511 ZENBU genome browser for 1) its independence from neighboring genes on the same strand (if  
512 any), 2) support from RNA-Seq (for exons and splicing junctions) and CAGE data (for TSS) of its  
513 transcript models and 3) support from histone marks at TSS for transcription initiation (H3K27ac)  
514 and along gene body for elongation (H3K36me3), from Roadmap Epigenomics Consortium  
515 (Roadmap Epigenomics Consortium et al. 2015). A representative transcript model, which best  
516 represents the RNA-Seq signal, was manually chosen from each loci for design of antisense  
517 oligonucleotides (ASOs). In total, 285 lncRNA loci were chosen for ASO suppression. Additional  
518 controls (NEAT1, protein coding genes Supplementary Table S1) were added including MALAT1  
519 as an experimental control.

520

### 521 ASO design

522 ASOs were designed as RNase H-recruiting locked nucleic acid (LNA) phosphorothioate gapmers  
523 with a central DNA gap flanked by 2-4 LNA nucleotides at the 5' and 3' ends of the ASOs. For  
524 each lncRNA target, we used the unspliced transcript sequence from FANTOM CAT as template  
525 for designing a minimum of 5 ASOs per lncRNA. A total of 2,055 ASOs targeting 285 lncRNAs  
526 were designed for the study (Supplementary Table S1). The gapmer ASOs were between 16 and

527 19 nucleotides in length (median of 17 nucleotides), had no predicted perfect match off-targets  
528 and 0-1 one-mismatched off-targets, and were designed with a predicted melting temperature  
529 ( $T_m$ ) in the range of 50-56 °C (Pedersen et al. 2014). The ASOs were synthesized by Exiqon  
530 (~1,500 ASOs) and GeneDesign (~500 ASOs) Inc. and subsequently classified as exonic or  
531 intronic based on overlap with exons in FANTOM CAT gene models.

532

#### 533 Cell culture

534 Human dermal fibroblasts (HDFs) were derived from the dermis of normal human neonatal  
535 foreskin cells (Lonza, catalog number: C2509). The cells were cultured in Dulbecco's Modified  
536 Eagle's medium (high glucose with L-glutamine) supplemented with 10% fetal bovine serum at  
537 37 °C in a 5% CO<sub>2</sub> incubator. The passage number of the cells for transfection was maintained  
538 at six or seven.

539

#### 540 Automated cell culturing, ASO transfection and cell harvesting

541 Robotic automation (Hamilton®) was established to provide stable environment and accurate  
542 procedural timing control for cell culturing and transfection. In brief, trypsin-EDTA detachment,  
543 cell number and viability quantification, cell seeding, transfection and cell harvesting were  
544 performed with automation. All transfections were divided into 28 runs at weekly basis. ASO  
545 transfection was performed with duplication. In each run, there were 16 independent transfections  
546 with ASO negative control A (NC\_A, Exiqon) and 16 wells transfected with an ASO targeting  
547 *MALAT-1* (Exiqon).

548 The HDF cells were seeded in 12-well plates with 80,000 cells in each well 24 hrs prior to the  
549 transfection. A final concentration of 20 nM ASO and 2 µl lipofectamine RNAiMAX (Thermo Fisher  
550 Scientific) were mixed in 200 µl OptiMEM (Thermo Fisher Scientific). The mixture was incubated  
551 at room temperature for 5 min and added to the cells, which were maintained in 1 ml complete  
552 medium. The cells were harvested 48 hrs post-transfection by adding 200 µl RLT buffer from the  
553 RNeasy 96 Kit (Qiagen) after PBS washing. The harvested lysates were kept at -80 °C.

554

#### 555 RNA purification

556 The harvested lysates were subjected to purification using RNeasy 96 Kit (Qiagen) and epMotion  
557 automated liquid handling systems (Eppendorf) according to the manufacturer's instructions,  
558 except an additional washing step by RPE buffer. The eluted RNA was qualified and quantified  
559 by the Dropsense spectrophotometry platform (Trinean). The RNA was stored at -80 °C.

560

561 Real-time quantitative RT-PCR

562 Real-time quantitative RT-PCR was performed by One Step SYBR PrimeScript™ RT-PCR Kit II  
563 (Takara) using the epMotion automated liquid handling system (Eppendorf). For each sample,  
564 three primer pairs against the specific lncRNA target were used. The expression level was  
565 normalized by GAPDH while the knockdown efficiency was calculated from the fold-change  
566 between each sample and NC\_A. The knockdown efficiency of *MALAT-1* was monitored along  
567 each run and across all the runs where all the samples have >90% knockdown. The primers'  
568 sequences are listed in (Supplementary Table S2). In general, the knockdown RNA samples  
569 having >50% knockdown efficiency shown consistently by one of the primer pairs were subjected  
570 to CAGE. Exceptions included insufficient amount of RNA due to cell death and great knockdown  
571 variation between replicates.

572

573 ASO transfection for real-time imaging

574 The HDF cells were transfected manually in 96-well plate to facilitate high-throughput real time  
575 imaging. The cells were seeded 24 hrs before transfection at a density of 5,200 cells per well. A  
576 final concentration of 20 nM ASO and 2 µl lipofectamine RNAiMAX (Thermo Fisher Scientific)  
577 were mixed in 200 µl OptiMEM (Thermo Fisher Scientific). After incubating at room temperature  
578 for 5 min, 18 µl of the transfection mix was added to 90 µl complete medium in each well. The  
579 ASOs were divided in 14 runs and transfected in duplicates. Each plate accommodated 6 wells  
580 of NC\_A control, 2 wells of *MALAT1* ASO control and 2 wells of mock-transfection (lipofectamine  
581 alone) control.

582 Phase-contrast images of transfected cells were captured every 3 hrs for 2 days with 3 fields per  
583 well by the IncuCyte® live-cell imaging system (Essen Bioscience). The confluence in each field  
584 was analyzed by the IncuCyte® software. The mean confluence of each well was taken along the  
585 timeline until the mean confluence of the NC\_A control in the same plate reached 90%. The  
586 growth rate in each well was calculated as the slope of a linear regression. A normalized growth  
587 rate of each replicate was calculated as the growth rate divided by the mean growth rate of the 6  
588 NC\_A controls from the same plate. Student's t-test was performed between the growth rate of  
589 the duplicated samples and the 6 NC\_A controls, assuming equal variance.

590

591 Cell fractionation for RNA-sequencing

592 A previously described method (Conrad and Ørom 2017) was adopted for the isolation of  
593 cytoplasmic, nucleoplasmic and chromatin-associated RNA. Approximately 10 million cells were  
594 used per fractionation experiment. Briefly, trypsinized cells were washed and lysed using cold

595 lysis buffer containing 0.15% Igepal CA-630, 10 mM Tris pH 7.5, 150 mM NaCl. The lysate was  
596 centrifuged in a sucrose cushion, after which the supernatant was taken as the cytoplasmic  
597 fraction. The nuclear pellet was washed once in buffer containing 20mM HEPES pH 7.5, 50%  
598 glycerol, 75 mM NaCl, 1 mM DTT, 0.5 mM EDTA and suspended again in the same buffer. An  
599 equal volume of nuclear lysis buffer containing 20mM HEPES pH 7.5, 300mM NaCl, 1M Urea,  
600 1% Igepal CA-630, 10mM MgCl<sub>2</sub>, 1mM DTT, 0.2mM EDTA was added and incubated on ice for  
601 5 min. After centrifugation, the supernatant was considered as the nucleoplasmic fraction and the  
602 pellet as the chromatin fraction. The chromatin pellet was washed once in buffer containing 10  
603 mM HEPES pH 7.5, 10 mM KCl, 10% glycerol, 340 mM sucrose, 4 mM MgCl<sub>2</sub>, 1 mM DTT and  
604 suspended in the same buffer. RNA from each fraction was isolated using Trizol LS (Invitrogen)  
605 according to manufacturer's instructions. To ensure RNA purity, DNase I treatment followed by  
606 phenol-chloroform extraction was conducted. RNA isolated from each fraction was subjected to  
607 RNA-sequencing.

608

609 Ki-67 staining upon lncRNA knockdown

610 For the selected four lncRNA targets showing >25% growth inhibition, we used two siRNAs and  
611 ASOs with independent sequences. The *Silencer® Select siRNAs* were obtained from Invitrogen  
612 and ASOs were from geneDesign (Supplementary Table S9). The HDF cells were transfected  
613 with 20 nM siRNA or ASO in 12-well plates by lipofection. The cells were seeded 24 hours before  
614 transfection at a density of 60,000 cells per well. At 48 hrs post-transfection, cells were washed  
615 by PBS and harvested by trypsin-EDTA. Cells from the two wells with the same transfection were  
616 collected into one tube. After PBS washing, the cells were fixed by adding pre-chilled 70% ethanol  
617 and incubated in -20 °C for at least 2 hours. Ethanol was then removed by centrifugation and the  
618 cells were washed by FACS buffer (2% FBS in PBS, 0.05% NaN<sub>3</sub>) twice. FITC-conjugated Ki-67  
619 (20Raj1, eBioscience) was applied to cells at a ratio of 8 µl per 150,000 cells. Same concentration  
620 of FITC-conjugated mouse IgG1 kappa antibody (eBioscience) was used as isotypic control. After  
621 1 hr incubation at 4 °C, cells were washed by FACS buffer and subjected to flow cytometric  
622 analysis. Knockdown efficiency by siRNA was determined by real-time quantitative RT-PCR using  
623 the same 3 primer pairs as for ASO knockdown efficiency.

624

625 Wound closure assay

626 The HDF cells were transfected by 20nM ASO as described earlier in 12-well plates. The cells  
627 were re-plated at 24 hrs post-transfection into a 96-well ImageLock plate (Essen BioScience) at  
628 a density of 20,000 cells per well. At 24 hrs after seeding, cells form a spatially uniform monolayer

629 with 95-100% cell confluence. The cells were incubated with 5  $\mu\text{g}/\text{mL}$  mitomycin-C for 2 hrs to  
630 inhibit cell division. Then, medium was refreshed and a uniform scratch was created in each well  
631 by the WoundMaker™(Essen BioScience). After changing the medium twice, the cells were  
632 maintained in medium with 0.5% FBS. The condition of mitomycin C and serum concentrations  
633 was tested with HDF and showed complete growth inhibition without severe morphological  
634 change (unpublished data). The closure of the wound was monitored by IncuCyte® live-cell  
635 imaging system (Essen Bioscience) every 2 hrs for 24 hrs. At each time point, the relative wound  
636 density was calculated by the cell confluence within the wound area normalized by the cell  
637 confluence of the non-wound area in the same image. The relative wound closure rate was  
638 calculated as the slope of the linear regression of the relative wound density against time, followed  
639 by normalization with that of NC\_A. The RNA was harvested after the assay for real-time  
640 quantitative RT-PCR.

641

#### 642 Cell morphology quantification

643 For each transfection, representative phase-contrast image at a single time point was exported  
644 from the Incucyte time-series, when the confluence of NC\_A-transfected cells in each batch was  
645 around 80% (at 30 – 36 hrs post-transfection). These raw images were first transformed to  
646 probability maps of cells by pixel classification using ilastik (v1.3.2)  
647 (<https://github.com/ilastik/ilastik.github.io/blob/master/publications.html>). Three-pixel categories  
648 including cell, cell boundary, and background were manually labeled in a set of randomly selected  
649 images. The trained model was then applied to all images in the batch mode. The predicted  
650 probability maps of cells (grey scale, 16 bits tiff format) were subsequently used for morphology  
651 quantification in CellProfiler (v3.1.5) (Carpenter et al. 2006). In brief, binarized segmented cell  
652 images were obtained using the module IdentifyPrimaryObjects (thresholding by Global Otsu  
653 method, followed by intensity-based declumping) and the morphology measurements were  
654 performed by the module MeasureObjectSizeShape ([http://cellprofiler-](http://cellprofiler-manual.s3.amazonaws.com/CellProfiler-3.0.0/modules/measurement.html#measureobjectsize)  
655 [manual.s3.amazonaws.com/CellProfiler-](http://cellprofiler-manual.s3.amazonaws.com/CellProfiler-3.0.0/modules/measurement.html#measureobjectsize)  
656 [3.0.0/modules/measurement.html#measureobjectsize](http://cellprofiler-manual.s3.amazonaws.com/CellProfiler-3.0.0/modules/measurement.html#measureobjectsize)). All the values (medians) were  
657 further normalized by those of NC\_A from the matching transfection plate, identically to  
658 normalizing the growth rate.

659

#### 660 Cap analysis of gene expression (CAGE)

661 Four micrograms of purified RNA were used to generate libraries according to the nAnT-iCAGE  
662 protocol (Murata et al. 2014). Briefly, random primer with anchor was used for cDNA synthesis,

663 followed by biotinylation and RNaseI digestion. After cap trapping of the 5' end complete cDNA  
664 and linker ligation, second-strand was synthesized for dsDNA. Libraries were combined in 8-plex  
665 using different barcodes and were subjected to 50-base single-end sequencing using an Illumina  
666 HiSeq 2500 instrument. Tags were de-multiplexed and mapped to human genome assembly hg38  
667 using TopHat 2.0.12. The average mapping rate was 68.9% with around 10 million mapped  
668 counts obtained on average across all samples.

669

670 The samples with mapped counts lower than 500,000 were excluded from further analysis.  
671 Several samples were flagged as “questionable” if their mapped counts were less than  
672 1,000,000 or their A260/A230 ratio were less than 1.0. Additionally, we manually flagged as  
673 “questionable” if any exceptional QC metrics were detected after sequencing, which includes  
674 lower amounts of library volumes and possible errors in experiments.

675

676 CAGE promoter and gene expression and batch correction

677 Expression for CAGE promoters was estimated by counting the numbers of mapped tags falling  
678 using 379,953 promoter regions of gene models as described in ‘*Gene Models and lncRNA*  
679 *targets selections*’. From there, expression of each of 124,245 genes was estimated by summing  
680 up the expression values of all promoters assigned to a given gene.

681 Batch correction was performed on the log-transformed ‘cpm’ values with the prior.count set to  
682 0.25 and normalized for the library sizes using ‘removeBatchEffect’ function from the ‘limma’ R  
683 package where the ‘batch’ was attributed to the CAGE sequencing runs and ‘batch2’, ‘design’ and  
684 ‘covariates’ parameters not used.

```
685 logCPM <- cpm(dge, log=TRUE, prior.count=0.25, normalized.lib.sizes = T)
```

```
686 removeBatchEffect(logCPM, batch = 'CAGE_Isid')
```

687

688 Differential promoter and gene expression

689 Differential promoter/gene expression was carried separately for each ASO knockdown (mainly  
690 duplicated CAGE libraries) against matching (the same CAGE sequencing run) negative controls  
691 using DESeq 2.16 with default parameters. For a few ASO knockdowns where CAGE replicates  
692 were in distinct sequencing runs, a generalized linear model (*glm*) with appropriate design was  
693 used. Only promoters/genes with a mean count  $\geq 1$ TPM in either knockdown or negative control  
694 libraries were tested. Promoter/gene was differentially expressed if  $|\log_2FC| > 0.5$ ;  $fdr < 0.05$  and  
695  $|ZScore| > 1.645$ ; where ZScore was obtained by scaling relative expression change ( $\log_2FC$ ) of  
696 each tested promoter/gene was across all experiments.

697

#### 698 Motif Activity Response Analysis (MARA)

699 MARA was performed using batch corrected promoter expression for all the knock-down (KD)  
700 and control (both NC\_A and NC\_B) libraries (970 CAGE libraries). All promoters with expression  
701  $\geq 1$ TPM at least in 70% CAGE libraries (24,014 promoters) were used for the analysis.  
702 Transcription factor binding sites (TFBS) for hg38 were predicted as described previously (Arner  
703 et al. 2015) using MotEvo (Arnold et al. 2012) for the set of 190 position-weight matrix motifs in  
704 SwissRegulon (released on 13 July 2015) (Pachkov et al. 2013) on a multiple alignment of  
705 genome assemblies hg38 (human), rheMac3 (macaque), mm10 (mouse), rn6 (rat), bosTau8  
706 (cow), equCab2 (horse), canFam3 (dog), monDom5 (opossum), and galGal4 (chicken). The  
707 number of predicted TFBS were counted for each motif in the -300 to +100 base pair from the  
708 midpoint of the FANTOM CAT promoters. Next MARA was performed to decompose CAGE  
709 expression profiles of the promoters in terms of their associated motifs, yielding the activity profile  
710 of all the motifs with at least 150 TFBS associated with the expressed promoters across the HDF  
711 KD+controls samples.

712

#### 713 Gene Set Enrichment Analysis

714 Gene set enrichment (GO Biological Process, GO Molecular Function, GO Cellular Component,  
715 KEGG, Hallmark and Reactome) analysis was carried separately for each pathway and each ASO  
716 knockdown using fgsea (1.8.0) R-package with the following parameters: set.seed(42),  
717 minSize=15, maxSize=1000, nperm=100,000, nproc=1. Each pathway was tested based on  
718 log<sub>2</sub>FC preranked genes values from DESeq2 analysis. Pathway was significantly enriched if  
719  $|NES| > 1$ ;  $fdr < 0.05$  and  $|ZScore| > 1.645$ .; where ZScore was obtained by scaling GSEA  
720 significance of enrichment:  $-\log_{10}(pvalue) * \text{sign}(NES)$  of each tested pathway across all  
721 knockdowns.

722

#### 723 Fantom5 coexpression clusters

724 Enrichment of Fantom5 coexpression clusters was calculated using fgsea (1.8.0) R-package with  
725 the following parameters: set.seed(42), minSize=15, maxSize=5000, nperm=100,000, nproc=1.  
726 Coexpression clusters were tested based on log<sub>2</sub>FC preranked genes values from DESeq2  
727 analysis.

728

#### 729 Unsupervised clustering of genomic regions

730 The unsupervised clustering was performed with CREAM algorithm using all promotes with  
731  $\log_2FC < -1$  or  $\log_2FC > 1$  and based on genomic coordinates of dysregulated transcripts.

732

733 Cellular and molecular phenotype correlations

734 Growth and morphology values were correlated for each ASO against 1) each GSEA pathway  
735 using enrichment score, 2) motif activity of each MARA motif ( $\geq 1$ TPM) and 3) each Fantom5  
736 coexpression clusters using enrichment score.

737

738 Significant lncRNA targets

739 The background was estimated 1,000 times for each functional feature (DEG, MARA, GSEA) and  
740 for each lncRNA separately by choosing  $n$  random ASOs from  $n$  distinct lncRNAs (where  $n$  is  
741 the number of all ASOs targeting a given lncRNA of) and, similarly, requiring that at least two of  
742 these ASOs show concordant significance. A target response was considered significant if the  
743 number of DEG or MARA or GSEA was above that estimated from the matching random  
744 background. So for example if a given lncRNA targeted by 3 ASOs has shown 100 DE genes in  
745 any of the two ASOs then it would be significant if 3 randomly chosen ASOs (repeated 1000 times)  
746 had median of less than 100 significant DE genes.

747

748 Promoter switching analysis

749 To identify promoter switching events we used normalized and batch-corrected promoter counts,  
750 considering only genes reaching 4 cpm in at least two of CAGE libraries and promoters reaching  
751 at least 2 cpm in any of CAGE libraries. From this pool, we only considered the ASOs and  
752 promoters that were included into the promoter-level differential expression data. Promoter pairs  
753 passing these expression thresholds corresponded to 7151 genes in total.

754 For each KD, for expression values of pairs of promoters of the same gene  $\langle p_A, p_B \rangle$ , we calculated  
755 their log-transformed ratios  $r = \log_2 p_A - \log_2 p_B$ , and estimated statistical significance of the  
756 difference  $abs(r_{NC} - r_{KD})$  between the data of a target knockdown (KD) induced by a given ASO  
757 and the negative control (NC) libraries. Student's T-test assuming the equal variance in NC and  
758 KD samples was used to evaluate significance. The p-values were FDR-corrected for multiple  
759 testing for the number of tested promoter pairs. Z-score transformation of the log2 fold changes  
760 between  $r_{KD}$  and  $r_{NC}$  across all ASOs was used to additionally filter by Z-score.

761

762 Promoter architecture usage



763 To identify a CGI overlap and TATA-box presence at ~30 bp upstream of the TSS, CAGE data  
764 were analyzed to identify the precise location of the most frequently used TSS. First, the mapped  
765 reads were imported using CAGEr package (Haberle et al. 2015), and CAGE supported TSSs  
766 (CTSS) were clustered within 20 bp distance, with single CTSS only allowed when > 5 TPM.  
767 These clusters were annotated using FANTOM CAT promoters (CAGE supported promoters).  
768 These were cross referenced with the differential expression gene list per experiment. A negative  
769 control per ASO experiment was chosen randomly to represent core promoter architecture and  
770 each CAGE supported promoter was annotated for a CGI overlapping the promoter and the  
771 presence of a TATA-box (PWM > 80 %) at -35 to -25 bp upstream of the most frequently used  
772 TSS. To avoid an effect of expression levels, we then divided, for each ASO, the CAGE supported  
773 promoters into 5 bins of expression level (low to high) and used stratified sampling (10,000 times)  
774 of the number of promoters in each class of differentially expressed genes separately (up and  
775 down) to assess significance. The background consisted of all promoters per ASO experiment in  
776 the negative control that were not significantly up- or downregulated.

777

778 Chromosome conformation capture (Hi-C)

779 Hi-C libraries were prepared essentially as described previously (Fraser, Ferrai, et al. 2015;  
780 Lieberman-Aiden et al. 2009) with minor changes to improve the DNA yield of Hi-C products  
781 (Fraser, Williamson, et al. 2015). The procedure followed is outlined as a flowchart in  
782 Supplementary Fig. 7a, and each step of the protocol is briefly described below.

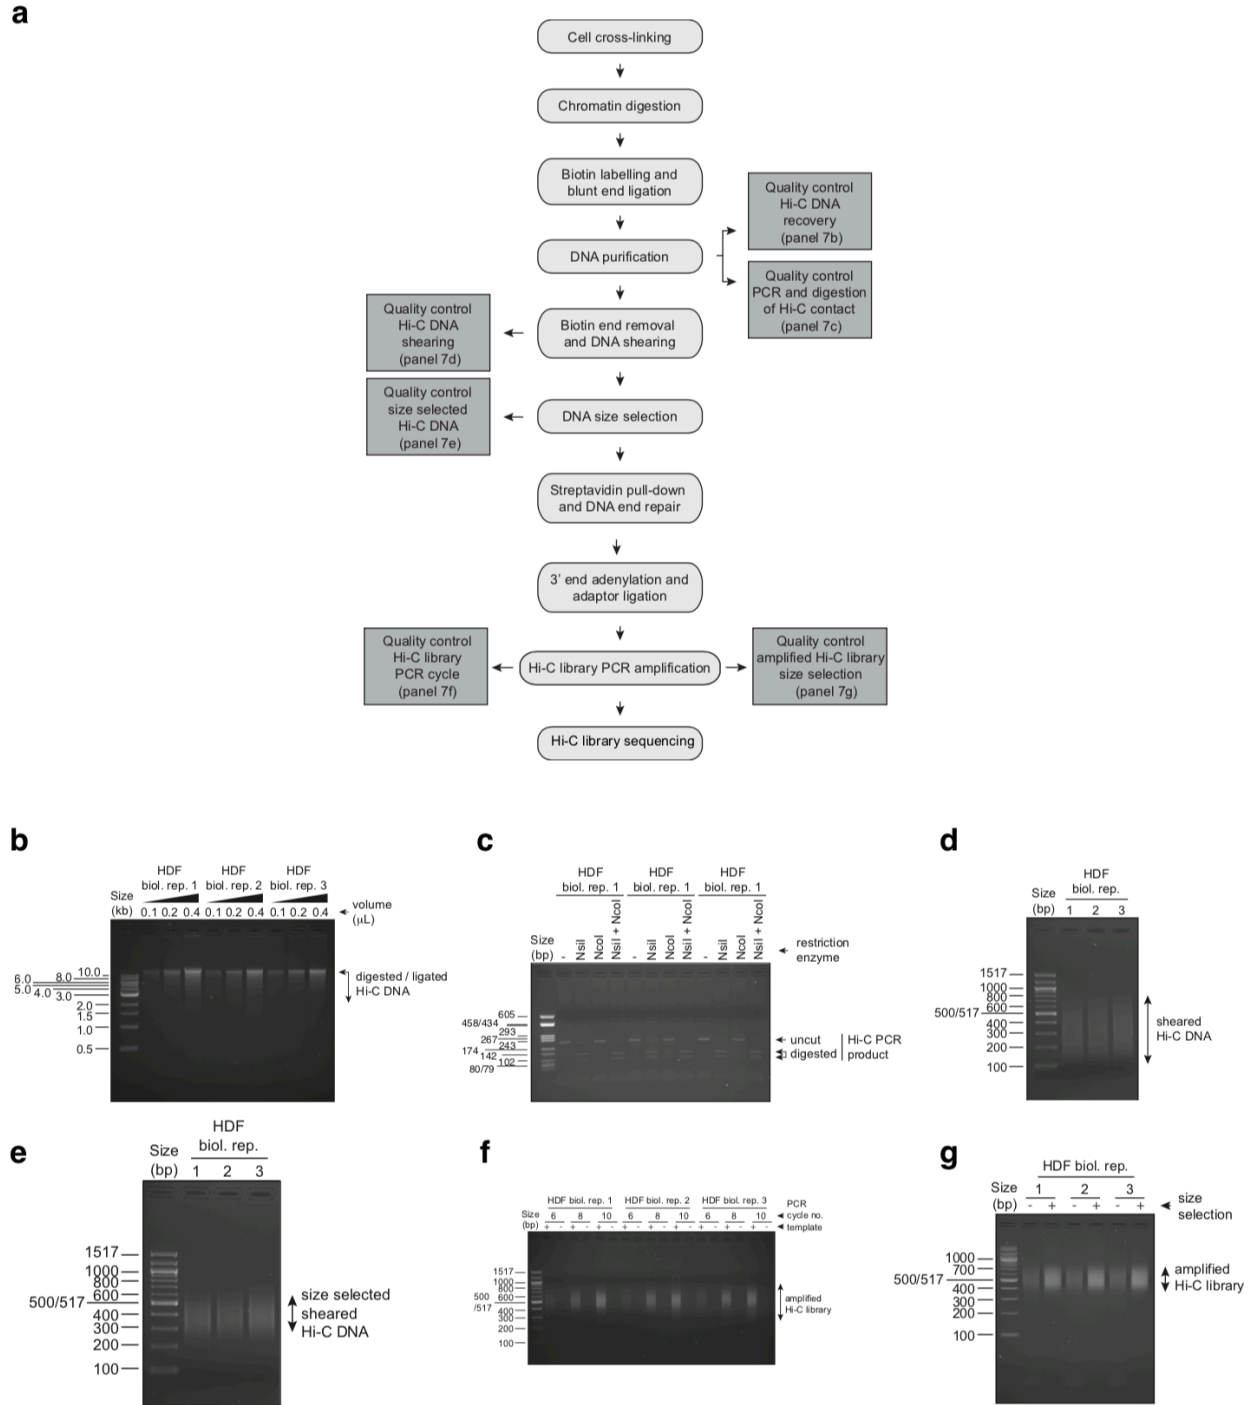

**Fig. S7: Hi-C protocol overview.** a, Flowchart of the Hi-C protocol with related quality control (QC) steps (b-g). b, cDNA recovery quality control. c, PCR and digestion QC. d, DNA shearing QC. e, DNA size-selection QC. f, PCR cycle QC. g, DNA size-selection QC.

783

784

785

786

787

788

789

790

791 *Cell cross-linking*

792 Three biological replicate samples of HDFs ( $\sim 1 \times 10^7$  cells) grown as described above were fixed  
793 at room temperature in media containing 1% formaldehyde (Sigma, catalog number: F8775) for  
794 10 minutes with gentle rocking every 2 minutes. Cross-linking was stopped by quenching the  
795 formaldehyde with glycine (Sigma, catalog number: G8898) at a final concentration of 125 mM  
796 for 5 minutes at room temperature, followed by 15 minutes on ice. The cells were then scraped  
797 off the plates and pelleted by gentle centrifugation at 400 g for 10 minutes. The quenched media  
798 was removed, and the cell pellets were quick-frozen on dry ice before storage at  $-80^\circ\text{C}$ .

799

800 *Chromatin digestion*

801 Cell pellets were resuspended into 440  $\mu\text{l}$  of 'Cold Lysis Buffer' containing protease inhibitors (10  
802 mM Tris pH 8.0, 10 mM NaCl, 0.2% Igepal; protease inhibitor cocktail as instructed by the  
803 manufacturer (Sigma, catalog number: P8340). The cells were incubated on ice for 15 minutes  
804 and lysed by twice 20 strokes with a Dounce homogenizer (Pestle B). Cell lysates were  
805 centrifuged at 5,000 rpm for 5 minutes at room temperature in a microcentrifuge. The pellets were  
806 washed twice with 400  $\mu\text{l}$  of 1X NEBuffer<sup>TM</sup> 3.1, centrifuged 5 minutes at room temperature at  
807 5,000 rpm, and resuspended in 200  $\mu\text{l}$  of 1X NEBuffer<sup>TM</sup> 3.1. Each sample was divided equally  
808 into 4 tubes before adding 312  $\mu\text{l}$  of 1X NEBuffer<sup>TM</sup> 3.1 to each tube. 1% SDS (38  $\mu\text{l}$ ) was added  
809 to each sample and incubated 10 minutes at  $65^\circ\text{C}$ . 10% Triton X-100 (44  $\mu\text{l}$ ) was mixed into each  
810 tube before adding 40  $\mu\text{l}$  of NcoI (10 U/ $\mu\text{l}$ ; 400 Units; NEB, catalog number: R0193L) and  
811 incubating a  $37^\circ\text{C}$  overnight.

812

813 *Biotin labeling and blunt end ligation*

814 Digested fragment ends were labeled with biotin by filling-in NcoI 5' overhangs with Klenow using  
815 biotinylated dCTP. Deoxynucleotides (1.5  $\mu\text{l}$  each of 10 mM dATP, dGTP, dTTP, and 37.5  $\mu\text{l}$  of  
816 0.4 mM biotin-14-dCTP (Life Technologies, catalog number: 19518018)) were added to each  
817 tube, along with 10  $\mu\text{l}$  of Klenow (5 U/ $\mu\text{l}$ ; 50 Units; NEB, catalog number: M0210S), and incubated  
818 at  $37^\circ\text{C}$  for 45 minutes. 10% SDS (86  $\mu\text{l}$ ) was mixed into each sample before incubating 30  
819 minutes at  $65^\circ\text{C}$ . The samples were transferred to 15 mL conical tubes containing 5.96 mL of  
820 water and 1.66 mL of 'Ligation mix' (10% Triton X-100 (750  $\mu\text{l}$ ), 10X Ligation Buffer (750  $\mu\text{l}$ ; 0.5  
821 M Tris pH 7.5, 0.1 M  $\text{MgCl}_2$ , 0.1 M DTT), 10 mg/mL BSA (80  $\mu\text{l}$ ), 100 mM ATP (80  $\mu\text{l}$ )). T4 DNA  
822 ligase (50  $\mu\text{l}$ ) was added to each tube (1 U/ $\mu\text{l}$ ; 50 Units, Invitrogen, catalog number: 15224-025),  
823 and incubated 4 hours at  $16^\circ\text{C}$ .

824

825 *DNA purification*

826 The DNA was purified by proteinase K digestion followed with phenol/chloroform extraction and  
827 ethanol precipitation. Proteinase K (50  $\mu$ l of 10 mg/mL) was added to each tube and incubated  
828 overnight at 65°C. Proteinase K was added again on the next day (50  $\mu$ l of 10 mg/mL) and  
829 incubated for an additional 2 hours. The samples were transferred to 50 mL conical tubes and  
830 extracted with 10 mL of phenol by vortexing 2 minutes and centrifugation at 2,465 g for 15 minutes  
831 at room temperature. The samples were extracted again as above but with phenol/chloroform  
832 before precipitating with ethanol. To this end, samples were transferred to 35 mL centrifuge  
833 bottles, and their volumes adjusted to 10 mL with 1X TE before 1 mL of 3 M sodium acetate (pH  
834 5.2) was mixed in and 25 mL of ice-cold ethanol was added. Each sample was gently mixed by  
835 inversion and incubated 1 hour at -80°C. The DNA was pelleted by centrifugation at 23,281 g  
836 (13,000 rpm if using SS34 rotor) for 25 minutes at 4°C, washed by resuspending in 10 mL of ice-  
837 cold 70% ethanol, and centrifuged again as above. Pellets were each dissolved into 450  $\mu$ l of 1X  
838 TE pH 8.0 and extracted twice with 500  $\mu$ l of phenol-chloroform by vortexing 1 minute and  
839 centrifuging at maximum speed for 5 minutes at room temperature in a microcentrifuge. The  
840 samples were precipitated with 3 M sodium acetate pH 5.2 (40  $\mu$ l) and absolute ethanol (1 mL),  
841 incubated at -80°C overnight, and centrifuged at maximum speed for 25 minutes at 4°C. The DNA  
842 was washed five times by resuspending in ice-cold 70% ethanol (1 mL), each time centrifuging at  
843 maximum speed for 20 minutes at 4°C. The resulting pellets were each dissolved in 25  $\mu$ l of 1X  
844 TE pH 8.0 before the 4 samples from original cell pellets were pooled. 10 mg/mL RNase A (1  $\mu$ l;  
845 Fermentas, catalog number: EN0531) was added and incubated for 30 minutes at 37°C. The Hi-  
846 C DNA was resolved on 0.8% agarose gel containing ethidium bromide (0.5  $\mu$ g/mL) for qualitative  
847 assessment of digestion, ligation, and yield based on calibrated molecular weight markers  
848 (Supplementary Fig. 7b).

849

850 *Quality control*

851 The quality of Hi-C DNA was quantitatively assessed by PCR titration of an expected Hi-C contact  
852 and digestion of the PCR product as previously outlined (Lieberman-Aiden et al. 2009). The Hi-C  
853 DNA was serially diluted in water from 1 to ~0.0005  $\mu$ L (2-fold; 11 dilutions), and 4  $\mu$ L aliquots  
854 were PCR-amplified (35 cycles) with primers against a gene desert sequence (GD09 NcoI 5'-  
855 GCAATTAGTGCTATGCCCATGTTTCCTTTGTTCC-3', GD10 NcoI 5'-  
856 CAGTCTTCTACCGCTCTTGTAATGGGGTT-3'). Half of each PCR reaction was resolved on  
857 1.5% agarose gels containing ethidium bromide (0.5  $\mu$ g/mL) to verify the presence of amplification  
858 products. The remaining products of the first 5 PCR reactions from each titration were pooled,

859 and divided equally into 4 tubes to digest with either NcoI, NsiI, NcoI/NsiI, or buffer control as  
860 described previously (Lieberman-Aiden et al. 2009). Digestion reactions were incubated 1 hour  
861 at 37°C, and resolved on 2% agarose gels containing ethidium bromide (0.5 µg/mL) to verify  
862 greater digestion efficiency with NsiI. In all 3 HDF biological replicates, over 75% of this PCR  
863 product digested specifically with NsiI (Supplementary Fig. 7c), pointing to efficient Hi-C product  
864 formation in the samples.

865

#### 866 *Removal of biotin from unligated ends and DNA shearing*

867 Biotin at unligated restriction fragment ends was removed with T4 DNA polymerase as we  
868 described previously (Fraser, Ferrai, et al. 2015). Briefly, 10 samples each of 5 µg DNA from  
869 individual HDF replicates were mixed with 10µl of 10X NEBuffer™ 2.1, 1 µl of 10 mM dCTP, and  
870 5 Units of T4 DNA polymerase (NEB, catalog number: M0203L) in a final volume of 100 µl in  
871 MAXYMum Recovery™ PCR tubes (200 µl; Axygen, part number: PCR-02-L-C). The reactions  
872 were incubated in a thermocycler for 2 hours at 12°C, after which the enzyme was inactivated at  
873 75°C for 20 minutes. The samples were transferred to 1.7 mL tubes (Corning™ Costar™ Low  
874 Binding Plastic Microcentrifuge Tubes, part # C3207), and the DNA was precipitated by mixing  
875 10 µl of 3 M sodium acetate (pH 5.2) in each sample, followed by 275 µl of ice-cold ethanol, and  
876 incubating at -80°C overnight. The DNA was pelleted by centrifugation at 15,000 rpm in a  
877 microcentrifuge at 4°C for 25 minutes, washed twice with 500 µl ice-cold 70% ethanol each time  
878 centrifuging as above, and the resulting pellets were each dissolved in 130 µl of 10 mM Tris pH  
879 8.5. The DNA was sheared to ~350 bp fragments by sonication with a 'Covaris M220 Focused-  
880 ultrasonicator' using preset settings (DNA\_0300\_bp\_130µl\_Snap\_Cap\_Micro\_TUBE). Samples  
881 were individually transferred to 1.7 mL tubes and shearing to appropriate size range was verified  
882 by resolving 400 ng of each sample onto 1.5% agarose gel containing ethidium bromide (0.5  
883 µg/mL; Supplementary Fig. 7d).

884

#### 885 *DNA size selection*

886 The sheared DNA was size-selected using AMPure XP Beads (Agencourt XP) with ratios of 0.6X  
887 and 0.85X according to the manufacturer's instructions (Beckman Coulter, catalog number:  
888 A63880). Briefly, 78 µl of beads was added to each 130 µl sample and incubated with rotation for  
889 30 minutes at room temperature. The samples were placed on a DynaMag™ Magnet (Thermo  
890 Fisher Scientific) for 2 minutes, and the supernatant was re-extracted with 32.5 µl of beads as  
891 above to capture the appropriate size fragments. The beads were washed twice with 500 µl of  
892 ice-cold ethanol and air-dried 5 minutes. The DNA was eluted with 60 µl of 10 mM Tris pH 8.5 by

893 resuspending ten times with a pipette, and the 10 supernatants from each biological replicate  
894 were pooled to a 1.7 mL tube after placing samples on the magnetic stand for 2 minutes. The  
895 sample volumes were then reduced to 300  $\mu$ l with a SpeedVac concentrator, and 5  $\mu$ l of each  
896 sample was used to measure DNA concentrations with the Quant-iT™ PicoGreen™ dsDNA Assay  
897 Kit as per the manufacturer's instructions (Thermo Fisher Scientific, catalog number: P11496).  
898 This measure will be used below to calculate the amount of sequencing adaptor required. DNA  
899 recovery was verified by resolving 5  $\mu$ l of each sample on a 1.5% agarose gel containing ethidium  
900 bromide (0.5  $\mu$ g/mL; Supplementary Fig. 7e).

901

#### 902 *Streptavidin pull-down and DNA end repair*

903 The biotinylated Hi-C products were pull-down on Dynabeads MyOne™ Streptavidin C1 Beads  
904 (Thermo Fisher Scientific, catalog number: 65001) to enhance DNA end repair, 3' end  
905 adenylation, and ligation of sequencing adaptors. The beads (60  $\mu$ l for each Hi-C biological  
906 replicate) were washed with 400  $\mu$ l 'Tween Wash Buffer' (TWB; 5 mM Tris-HCl pH 8.0, 0.5 mM  
907 EDTA, 1 M NaCl, 0.05% Tween 20) twice for 3 minutes at room temperature with rotation, and  
908 pelleted on a DynaMag™ Magnet for 2 minutes between washes. Beads were next washed once  
909 with 300  $\mu$ l of '2X Binding Buffer' (2XBB; 10 mM Tris-HCl pH 8.0, 1 mM EDTA, 2 M NaCl), and  
910 resuspended in 300  $\mu$ l of 2XBB. Each 300  $\mu$ l-Hi-C library was added to a tube containing beads  
911 and incubated at room temperature for 15 minutes with rotation to bind the DNA. The supernatant  
912 was removed, and the beads were washed twice with 400 $\mu$ l of 1XBB (5 mM Tris-HCl pH 8.0, 0.5  
913 mM EDTA, 1 M NaCl), and once with 100  $\mu$ l of 1X Ligation Buffer (diluted from 10X, NEB, catalog  
914 number: B0202S). The supernatant was removed and 100  $\mu$ l of 'DNA End Repair Mix' was added  
915 to each sample (10X Ligation Buffer (10  $\mu$ l), 10 mM dNTPs (4  $\mu$ l), T4 DNA Polymerase (5 $\mu$ l of 3  
916 U/ $\mu$ l, NEB), T4 Polynucleotide Kinase (5  $\mu$ l of 10 U/ $\mu$ l, NEB), Klenow (1  $\mu$ l of 5 U/ $\mu$ l, NEB), water  
917 (75  $\mu$ l). The samples were transferred to MAXYMum Recovery™ 200  $\mu$ l PCR tubes and placed  
918 in a thermocycler for 30 minutes at 20°C. Samples were then transferred to 1.7 mL tubes, and  
919 the beads were washed twice with 200  $\mu$ l of TWB, and twice with 200  $\mu$ l Elution Buffer (EB; 10  
920 mM Tris-HCl pH 8.5), each time pelleting beads on a magnetic stand for 2 minutes.

921

#### 922 *3' end adenylation and sequencing adapter ligation*

923 To prevent concatenation of Hi-C products, DNA fragments were 3' adenylated and ligated to  
924 Illumina Paired-End (PE) sequencing adaptors with 3'-T overhangs. To this end, the supernatant  
925 was first removed from the beads and 50  $\mu$ l of 3' Adenylation Mix' was added to each tube (10X  
926 NEBuffer™ 2 (5  $\mu$ l), 10 mM dATP (1  $\mu$ l), Klenow Fragment (3'→5' exo-; 3  $\mu$ l of 5 U/ $\mu$ l, NEB, catalog

927 number: M0212S), water (41  $\mu$ l). The samples were transferred to MAXYMum Recovery™ 200  $\mu$ l  
928 PCR tubes and incubated 60 minutes at 37°C in a thermocycler. The samples were transferred  
929 to 1.7 mL tubes, and the beads were washed twice with 200  $\mu$ l of TWB, and twice with 200  $\mu$ l EB,  
930 each time pelleting beads on a magnetic stand for 2 minutes.

931 The amount of Illumina PE Adaptor needed for ligation depends on the amount of DNA in  
932 Hi-C samples. As a rule, 6 pmol of Illumina PE Adaptor (TruSeq™ DNA PCR-Free LT Library  
933 Prep Kit-Set A, Illumina, catalog number: FC-121-3001) was used for every 1  $\mu$ g of DNA  
934 measured with the Quant-iT™ PicoGreen™ dsDNA Assay Kit after size selection. The EB was  
935 removed from the beads and 45  $\mu$ l of 'Adaptor Ligation Mix' (5X Invitrogen Ligation buffer (10  $\mu$ l),  
936 Illumina PE Adaptors, water) was added. Sample were mixed by pipetting, and 5  $\mu$ l of T4 DNA  
937 Ligase (1 Weiss U/ $\mu$ l, Invitrogen, catalog number: 15224-025) was added to each tube. The  
938 samples were transferred to MAXYMum Recovery™ 200  $\mu$ l PCR tubes and incubated 60 minutes  
939 at 20°C in a thermocycler. The samples were transferred to 1.7 mL tubes, and the beads were  
940 washed twice for 6 minutes with 400  $\mu$ l of TWB, and twice with 400  $\mu$ l EB, each time pelleting  
941 beads on a magnetic stand for 1 minute. Each sample was finally resuspended in 50  $\mu$ l of EB.

942

#### 943 *PCR amplification of Hi-C libraries*

944 As a rule, the lowest possible PCR cycle number should be used to amplify enough Hi-C libraries  
945 to reduce amplification biases. To identify the optimal number of PCR cycles, 3 PCR reactions  
946 (25  $\mu$ l) were prepared for each Hi-C library and amplified through either 6, 8, or 10 cycles.  
947 Individual PCR reactions were composed of 1  $\mu$ l Hi-C library, 1.25  $\mu$ l each of 10  $\mu$ M Illumina PE  
948 1.0 and PE 2.0 primers, 12.5  $\mu$ l of Phusion High-Fidelity 2X Master Mix (NEB, catalog number:  
949 M0531S), and 9  $\mu$ l of water. The reactions were conducted in MAXYMum Recovery™ 200  $\mu$ l PCR  
950 tubes using the following PCR program: 1 cycle of 30 seconds at 98°C, either 6, 8, or 10 cycles  
951 of 10 seconds at 98°C / 30 seconds at 65°C / 30 seconds at 72°C, and a final cycle of 7 minutes  
952 at 72°C. The reactions were resolved on a 2.0% agarose gel containing ethidium bromide (0.5  
953  $\mu$ g/mL) to select the lowest possible cycle number when a product is detected (Supplementary  
954 Fig. 7f).

955 Eight PCR cycles was used for large-scale amplification of the libraries for which one set  
956 of 10 PCR reactions for each replicate were prepared as described above except that 1.5  $\mu$ l of  
957 Hi-C library was used in each reaction. The 10 PCRs from each replicate were pooled and their  
958 combined volume was adjusted to 215  $\mu$ l with water. The amplified DNA was then purified using  
959 AMPure XP Beads with a ratio of 0.8X by adding 172  $\mu$ l of washed beads to each pooled reaction  
960 tube and incubating for 10 minutes at room temperature while mixing. The captured DNA was

961 pelleted on a magnetic stand 2 minutes and washed twice on the beads with 1 mL of ice-cold  
962 70% ethanol. The beads were air-dried for no more than 5 minutes and the DNA was eluted from  
963 the beads by adding 33  $\mu$ L of 10 mM Tris pH 8.0, 0.1 mM EDTA and pipetting to resuspend the  
964 beads. Sample concentrations were measured using 2  $\mu$ L of the library and the Quant-iT™  
965 PicoGreen™ dsDNA Assay Kit as per the manufacturer's instructions (Thermo Fisher Scientific).  
966 DNA recovery and quality was verified by resolving 5  $\mu$ L of each sample on a 2.5% agarose gel  
967 containing ethidium bromide (0.5  $\mu$ g/mL; Supplementary Fig. 7g).

968

### 969 *Sequencing and processing*

970 The libraries were sequenced on a HiSeq 2500 Illumina platform, and paired-end reads were  
971 mapped to hg38 and processed using HiCUP pipeline ver. 0.5.10 (Wingett et al. 2015). Dtags  
972 were mapped against the human genome assembly hg38. Experimental artifacts such as  
973 circularized, re-ligated, continuous and incorrect size fragments were filtered out. PCR duplicates  
974 were removed from the aligned data. The sequencing and mapping metrics are in (Supplementary  
975 Table S10). Processed mapped dtags from all the three replicates were merged using Samtools  
976 ver. 1.3.1 (Li et al. 2009) for the further analysis. Significant co-localized regions at 10kb resolution  
977 were identified using BioConductor package GOTHIC (Mifsud B., PMID: 28379994). All the  
978 identified co-localized regions with p-value  $\leq$  0.01 and fdr  $\leq$  0.05 were used for the downstream  
979 analysis. TADs were identified using Arrowhead from Juicer pipeline (Durand et al. 2016). For the  
980 downstream analysis FANTOM CAT promoters were mapped to the colocalized regions and  
981 TADs.

982

### 983 RNA Fluorescence in situ hybridization (FISH)

984 Oligonucleotide probes against target RNA were designed using the Stellaris Probe Designer  
985 version 4.2 (Biosearch Tech). Probes were flanked on both ends with overhang arms serving as  
986 annealing sites for secondary probes labeled with a fluorescent dye (Chen et al 2015). Overhang  
987 sequences were identical on both ends. Secondary probe sequences have been previously  
988 described (Moffit et al 2016) and were labeled on the 3' end with Atto 647N. All probe sequences  
989 used in this study can be found in (Supplementary Table S11). Two-step hybridization was  
990 performed using a previously-described procedure (Kouno et al. 2019). Briefly, fibroblasts were  
991 seeded onto coverslips overnight and fixed in 4% formaldehyde in PBS for 10 min at room  
992 temperature. Following fixation, coverslips were treated twice with ice-cold 0.1% sodium  
993 borohydride for 5 min at 4 °C. Coverslips were washed three times in PBS, followed by cell  
994 permeabilization in 0.5% Triton X-100 in PBS for 10 min at room temperature. Coverslips were



995 again washed three times in PBS and treated with 70% formamide in 2X SSC for 10 min at room  
996 temperature. Coverslips were washed twice in ice-cold PBS and once in ice-cold 2X SSC.  
997 Coverslips were either used immediately for hybridization or stored in 70% ethanol for no longer  
998 than a week, in which case were washed in PBS twice and once in 2X SSC at room temperature  
999 prior to hybridization. For hybridization, coverslips were incubated at 37 °C overnight in  
1000 hybridization buffer containing 252 mM primary probe inside a humid chamber. Hybridization  
1001 buffer contained 10% dextran sulfate, 1ug/ul yeast tRNA, 2mM vanadyl ribonucleoside complex,  
1002 0.02% BSA, 10% formamide, 2X SSC. Excess probe was removed by two washes for 30 min at  
1003 room temperature in wash buffer containing 30% formamide, 2X SSC, 0.1% Triton X-100,  
1004 followed by a rinse in 2X SSC. For second hybridization, coverslips were incubated at 37 °C for  
1005 1.5 hrs in hybridization buffer containing 30 nM secondary probe. Excess probe was washed twice  
1006 for 20 min at room temperature. Coverslips were stained for 5 min in 2 mg/mL Hoescht in PBS,  
1007 washed three times in PBS, and mounted on a glass slide with SlowFade Gold Antifade Mountant  
1008 (Invitrogen). Imaging was done on a DeltaVision microscope (GE Healthcare) equipped with a  
1009 sCMOS sensor. Image processing was done using FIJI (Chen et al. 2015; Moffitt et al. 2016;  
1010 Kouno et al. 2019)

1011

1012

1013 **Acknowledgments**

1014 The work was supported by Ministry of Education, Science, Sports and Technology (MEXT) fund  
1015 to RIKEN Center for Life Science Technologies (CLST) and Integrative Medical Sciences (IMS).  
1016 The authors wish to acknowledge RIKEN GeNAS for generation and sequencing of the CAGE  
1017 libraries using Illumina HiSeq 2500, and subsequent data processing. IVK and IEV were  
1018 supported by RFBR 18-34-20024, AleFa was supported by NIH P30 CA006973 and RFBR 17-  
1019 00-00208, VsMa was supported by the Russian Academy of Sciences Project 0112-2019-0001,  
1020 NIH-NCI award R01CA200859 and DOD award W81XWH-16-1-0739, YAM was supported by  
1021 RSF 18-14-00240, Wellcome Trust Investigator Award to FM and ZENCODE-ITN (H2020)  
1022 programme of the European Commission to FM and AK. HB was supported by National  
1023 Bioscience Database Center (NBDC), Japan Science and Technology Agency (JST). AF is  
1024 supported by an Australian National Health and Medical Research Council Fellowship  
1025 APP1154524 and project grant APP1146321. CAMS, MST and RSY were funded by a UK  
1026 Medical Research Council (MRC) core grant to the MRC Human Genetics Unit. JD and DP were  
1027 supported by the Canadian Institutes of Health Research (CIHR MOP-142451). Work from CIB  
1028 was supported by grants MIUR n.974,CMPT177780 and MIUR  
1029 n.257/Ric, CTN01\_00177\_817708, Y.Ciani was supported by a FIRC fellowship. RG  
1030 acknowledges the support of the “Salvador de Madariaga” program from the Spanish Ministry of  
1031 Education, Culture and Sports during his sabbatical at the Riken; MMH was supported by the  
1032 Natural Sciences and Engineering Research Council of Canada (RGPIN-2015-3948). We also  
1033 thank Hiroto Atsui for research agreements and legal advice, Ri-ichiro Manabe for ethics, and  
1034 Saito Tsutomu for finances. We also thank Dr. Minh Doan (Broad Institute, Boston, MA, USA) for  
1035 discussion and advice on cell morphology quantification of Incucyte images.

1036

1037 **Author Information**

1038 Competing interests - all authors declare no competing interest

## 1039 Bibliography

- 1040 Ambasudhan, R., Talantova, M., Coleman, R., Yuan, X., Zhu, S., Lipton, S.A. and Ding, S.  
1041 2011. Direct reprogramming of adult human fibroblasts to functional neurons under defined  
1042 conditions. *Cell Stem Cell* 9(2), pp. 113–118.
- 1043 Arner, E., Daub, C.O., Vitting-Seerup, K., Andersson, R., Lilje, B., Drabløs, F., Lennartsson, A.,  
1044 Rönnerblad, M., Hrydziuszko, O., Vitezic, M., Freeman, T.C., Alhendi, A.M.N., Arner, P., Axton,  
1045 R., Baillie, J.K., Beckhouse, A., Bodega, B., Briggs, J., Brombacher, F., Davis, M. and  
1046 Hayashizaki, Y. 2015. Transcribed enhancers lead waves of coordinated transcription in  
1047 transitioning mammalian cells. *Science* 347(6225), pp. 1010–1014.
- 1048 Arnold, P., Erb, I., Pachkov, M., Molina, N. and van Nimwegen, E. 2012. MotEvo: integrated  
1049 Bayesian probabilistic methods for inferring regulatory sites and motifs on multiple alignments of  
1050 DNA sequences. *Bioinformatics* 28(4), pp. 487–494.
- 1051 Bai, J., Yao, B., Wang, L., Sun, L., Chen, T., Liu, R., Yin, G., Xu, Q. and Yang, W. 2018. lncRNA  
1052 A1BG-AS1 suppresses proliferation and invasion of hepatocellular carcinoma cells by targeting  
1053 miR-216a-5p. *Journal of Cellular Biochemistry*.
- 1054 Carninci, P., Kasukawa, T., Katayama, S., Gough, J., Frith, M.C., Maeda, N., Oyama, R.,  
1055 Ravasi, T., Lenhard, B., Wells, C., Kodzius, R., Shimokawa, K., Bajic, V.B., Brenner, S.E.,  
1056 Batalov, S., Forrest, A.R.R., Zavolan, M., Davis, M.J., Wilming, L.G., Aidinis, V. and RIKEN  
1057 Genome Exploration Research Group and Genome Science Group (Genome Network Project  
1058 Core Group) 2005. The transcriptional landscape of the mammalian genome. *Science*  
1059 309(5740), pp. 1559–1563.
- 1060 Carninci, P., Sandelin, A., Lenhard, B., Katayama, S., Shimokawa, K., Ponjavic, J., Semple,  
1061 C.A.M., Taylor, M.S., Engström, P.G., Frith, M.C., Forrest, A.R.R., Alkema, W.B., Tan, S.L.,  
1062 Plessy, C., Kodzius, R., Ravasi, T., Kasukawa, T., Fukuda, S., Kanamori-Katayama, M.,  
1063 Kitazume, Y. and Hayashizaki, Y. 2006. Genome-wide analysis of mammalian promoter  
1064 architecture and evolution. *Nature Genetics* 38(6), pp. 626–635.
- 1065 Carpenter, A.E., Jones, T.R., Lamprecht, M.R., Clarke, C., Kang, I.H., Friman, O., Guertin, D.A.,  
1066 Chang, J.H., Lindquist, R.A., Moffat, J., Golland, P. and Sabatini, D.M. 2006. CellProfiler: image  
1067 analysis software for identifying and quantifying cell phenotypes. *Genome Biology* 7(10), p.  
1068 R100.
- 1069 Carrieri, C., Cimatti, L., Biagioli, M., Beugnet, A., Zucchelli, S., Fedele, S., Pesce, E., Ferrer, I.,

- 1070 Collavin, L., Santoro, C., Forrest, A.R.R., Carninci, P., Biffo, S., Stupka, E. and Gustincich, S.  
1071 2012. Long non-coding antisense RNA controls Uchl1 translation through an embedded  
1072 SINEB2 repeat. *Nature* 491(7424), pp. 454–457.
- 1073 Chen, K.H., Boettiger, A.N., Moffitt, J.R., Wang, S. and Zhuang, X. 2015. RNA imaging.  
1074 Spatially resolved, highly multiplexed RNA profiling in single cells. *Science* 348(6233), p.  
1075 aaa6090.
- 1076 Cho, S.W., Xu, J., Sun, R., Mumbach, M.R., Carter, A.C., Chen, Y.G., Yost, K.E., Kim, J., He,  
1077 J., Nevins, S.A., Chin, S.-F., Caldas, C., Liu, S.J., Horlbeck, M.A., Lim, D.A., Weissman, J.S.,  
1078 Curtis, C. and Chang, H.Y. 2018. Promoter of lncRNA Gene PVT1 Is a Tumor-Suppressor DNA  
1079 Boundary Element. *Cell* 173(6), p. 1398–1412.e22.
- 1080 Collado-Torres, L., Nellore, A., Kammers, K., Ellis, S.E., Taub, M.A., Hansen, K.D., Jaffe, A.E.,  
1081 Langmead, B. and Leek, J.T. 2017. Reproducible RNA-seq analysis using recount2. *Nature*  
1082 *Biotechnology* 35(4), pp. 319–321.
- 1083 Conrad, T. and Ørom, U.A. 2017. Cellular Fractionation and Isolation of Chromatin-Associated  
1084 RNA. *Methods in Molecular Biology* 1468, pp. 1–9.
- 1085 Derrien, T., Johnson, R., Bussotti, G., Tanzer, A., Djebali, S., Tilgner, H., Guernec, G., Martin,  
1086 D., Merkel, A., Knowles, D.G., Lagarde, J., Veeravalli, L., Ruan, X., Ruan, Y., Lassmann, T.,  
1087 Carninci, P., Brown, J.B., Lipovich, L., Gonzalez, J.M., Thomas, M. and Guigó, R. 2012. The  
1088 GENCODE v7 catalog of human long noncoding RNAs: analysis of their gene structure,  
1089 evolution, and expression. *Genome Research* 22(9), pp. 1775–1789.
- 1090 Durand, N.C., Shamim, M.S., Machol, I., Rao, S.S.P., Huntley, M.H., Lander, E.S. and Aiden,  
1091 E.L. 2016. Juicer Provides a One-Click System for Analyzing Loop-Resolution Hi-C  
1092 Experiments. *Cell systems* 3(1), pp. 95–98.
- 1093 Engreitz, J.M., Haines, J.E., Perez, E.M., Munson, G., Chen, J., Kane, M., McDonel, P.E.,  
1094 Guttman, M. and Lander, E.S. 2016. Local regulation of gene expression by lncRNA promoters,  
1095 transcription and splicing. *Nature* 539(7629), pp. 452–455.
- 1096 Engreitz, J.M., Ollikainen, N. and Guttman, M. 2016. Long non-coding RNAs: spatial amplifiers  
1097 that control nuclear structure and gene expression. *Nature Reviews. Molecular Cell Biology*  
1098 17(12), pp. 756–770.
- 1099 FANTOM Consortium and the RIKEN PMI and CLST (DGT), Forrest, A.R.R., Kawaji, H., Rehli,  
1100 M., Baillie, J.K., de Hoon, M.J.L., Haberle, V., Lassmann, T., Kulakovskiy, I.V., Lizio, M., Itoh,

- 1101 M., Andersson, R., Mungall, C.J., Meehan, T.F., Schmeier, S., Bertin, N., Jørgensen, M.,  
1102 Dimont, E., Arner, E., Schmidl, C. and et al. 2014. A promoter-level mammalian expression  
1103 atlas. *Nature* 507(7493), pp. 462–470.
- 1104 FANTOM Consortium, Suzuki, H., Forrest, A.R.R., van Nimwegen, E., Daub, C.O., Balwierz,  
1105 P.J., Irvine, K.M., Lassmann, T., Ravasi, T., Hasegawa, Y., de Hoon, M.J.L., Katayama, S.,  
1106 Schroder, K., Carninci, P., Tomaru, Y., Kanamori-Katayama, M., Kubosaki, A., Akalin, A., Ando,  
1107 Y., Arner, E. and Hayashizaki, Y. 2009. The transcriptional network that controls growth arrest  
1108 and differentiation in a human myeloid leukemia cell line. *Nature Genetics* 41(5), pp. 553–562.
- 1109 Fraser, J., Ferrai, C., Chiariello, A.M., Schueler, M., Rito, T., Laudanno, G., Barbieri, M., Moore,  
1110 B.L., Kraemer, D.C.A., Aitken, S., Xie, S.Q., Morris, K.J., Itoh, M., Kawaji, H., Jaeger, I.,  
1111 Hayashizaki, Y., Carninci, P., Forrest, A.R.R., FANTOM Consortium, Semple, C.A. and  
1112 Nicodemi, M. 2015. Hierarchical folding and reorganization of chromosomes are linked to  
1113 transcriptional changes in cellular differentiation. *Molecular Systems Biology* 11(12), p. 852.
- 1114 Fraser, J., Williamson, I., Bickmore, W.A. and Dostie, J. 2015. An Overview of Genome  
1115 Organization and How We Got There: from FISH to Hi-C. *Microbiology and Molecular Biology  
1116 Reviews* 79(3), pp. 347–372.
- 1117 Garieri, M., Delaneau, O., Santoni, F., Fish, R.J., Mull, D., Carninci, P., Dermitzakis, E.T.,  
1118 Antonarakis, S.E. and Fort, A. 2017. The effect of genetic variation on promoter usage and  
1119 enhancer activity. *Nature Communications* 8(1), p. 1358.
- 1120 GTEx Consortium 2015. Human genomics. The Genotype-Tissue Expression (GTEx) pilot  
1121 analysis: multitissue gene regulation in humans. *Science* 348(6235), pp. 648–660.
- 1122 Gupta, R.A., Shah, N., Wang, K.C., Kim, J., Horlings, H.M., Wong, D.J., Tsai, M.-C., Hung, T.,  
1123 Argani, P., Rinn, J.L., Wang, Y., Brzoska, P., Kong, B., Li, R., West, R.B., van de Vijver, M.J.,  
1124 Sukumar, S. and Chang, H.Y. 2010. Long non-coding RNA HOTAIR reprograms chromatin  
1125 state to promote cancer metastasis. *Nature* 464(7291), pp. 1071–1076.
- 1126 Guttman, M., Donaghey, J., Carey, B.W., Garber, M., Grenier, J.K., Munson, G., Young, G.,  
1127 Lucas, A.B., Ach, R., Bruhn, L., Yang, X., Amit, I., Meissner, A., Regev, A., Rinn, J.L., Root,  
1128 D.E. and Lander, E.S. 2011. lincRNAs act in the circuitry controlling pluripotency and  
1129 differentiation. *Nature* 477(7364), pp. 295–300.
- 1130 Guttman, M. and Rinn, J.L. 2012. Modular regulatory principles of large non-coding RNAs.  
1131 *Nature* 482(7385), pp. 339–346.

- 1132 Haberle, V., Forrest, A.R.R., Hayashizaki, Y., Carninci, P. and Lenhard, B. 2015. CAGEr:  
1133 precise TSS data retrieval and high-resolution promoterome mining for integrative analyses.  
1134 *Nucleic Acids Research* 43(8), p. e51.
- 1135 Haberle, V., Li, N., Hadzhiev, Y., Plessy, C., Previti, C., Nepal, C., Gehrig, J., Dong, X., Akalin,  
1136 A., Suzuki, A.M., van IJcken, W.F.J., Armant, O., Ferg, M., Strähle, U., Carninci, P., Müller, F.  
1137 and Lenhard, B. 2014. Two independent transcription initiation codes overlap on vertebrate core  
1138 promoters. *Nature* 507(7492), pp. 381–385.
- 1139 Hardwick, S.A., Bassett, S.D., Kaczorowski, D., Blackburn, J., Barton, K., Bartonicek, N.,  
1140 Carswell, S.L., Tilgner, H.U., Loy, C., Halliday, G., Mercer, T.R., Smith, M.A. and Mattick, J.S.  
1141 2019. Targeted, High-Resolution RNA Sequencing Of Non-Coding Genomic Regions  
1142 Associated With Neuropsychiatric Functions. *Biorxiv*, p. 539882.
- 1143 Hinrichs, A.S., Karolchik, D., Baertsch, R., Barber, G.P., Bejerano, G., Clawson, H., Diekhans,  
1144 M., Furey, T.S., Harte, R.A., Hsu, F., Hillman-Jackson, J., Kuhn, R.M., Pedersen, J.S., Pohl, A.,  
1145 Raney, B.J., Rosenbloom, K.R., Siepel, A., Smith, K.E., Sugnet, C.W., Sultan-Qurraie, A. and  
1146 Kent, W.J. 2006. The UCSC Genome Browser Database: update 2006. *Nucleic Acids Research*  
1147 34(Database issue), pp. D590-8.
- 1148 Hon, C.-C., Ramilowski, J.A., Harshbarger, J., Bertin, N., Rackham, O.J.L., Gough, J.,  
1149 Denisenko, E., Schmeier, S., Poulsen, T.M., Severin, J., Lizio, M., Kawaji, H., Kasukawa, T.,  
1150 Itoh, M., Burroughs, A.M., Noma, S., Djebali, S., Alam, T., Medvedeva, Y.A., Testa, A.C. and  
1151 Forrest, A.R.R. 2017. An atlas of human long non-coding RNAs with accurate 5' ends. *Nature*  
1152 543(7644), pp. 199–204.
- 1153 de Hoon, M., Shin, J.W. and Carninci, P. 2015. Paradigm shifts in genomics through the  
1154 FANTOM projects. *Mammalian Genome* 26(9–10), pp. 391–402.
- 1155 Imada, E.L., Sanchez, D.F., Collado-Torres, L., Wilks, C., Matam, T., Dinalankara, W.,  
1156 Stupnikov, A., Lobo-Pereira, F., Yip, C.W., Yasuzawa, K., Kondo, N., Itoh, M., Suzuki, H.,  
1157 Kasukawa, T., Hon, C.C., de Hoon, M., Shin, J.W., Carninci, P., FANTOM consortium, Jaffe,  
1158 A.E., Leek, J.T., Favorov, A., Franco, G.R., Langmead, B., Marchionni L. Recounting the  
1159 FANTOM Cage Associated Transcriptome bioRxiv 659490; doi: <https://doi.org/10.1101/659490>  
1160
- 1161 Iyer, M.K., Niknafs, Y.S., Malik, R., Singhal, U., Sahu, A., Hosono, Y., Barrette, T.R., Prensner,  
1162 J.R., Evans, J.R., Zhao, S., Poliakov, A., Cao, X., Dhanasekaran, S.M., Wu, Y.-M., Robinson,  
1163 D.R., Beer, D.G., Feng, F.Y., Iyer, H.K. and Chinnaiyan, A.M. 2015. The landscape of long  
1164 noncoding RNAs in the human transcriptome. *Nature Genetics* 47(3), pp. 199–208.

- 1165 Joung, J., Engreitz, J.M., Konermann, S., Abudayyeh, O.O., Verdine, V.K., Aguet, F.,  
1166 Gootenberg, J.S., Sanjana, N.E., Wright, J.B., Fulco, C.P., Tseng, Y.-Y., Yoon, C.H., Boehm,  
1167 J.S., Lander, E.S. and Zhang, F. 2017. Genome-scale activation screen identifies a lncRNA  
1168 locus regulating a gene neighbourhood. *Nature* 548(7667), pp. 343–346.
- 1169 Kalluri, R. 2016. The biology and function of fibroblasts in cancer. *Nature Reviews. Cancer*  
1170 16(9), pp. 582–598.
- 1171 Kim, T.H., Barrera, L.O., Zheng, M., Qu, C., Singer, M.A., Richmond, T.A., Wu, Y., Green, R.D.  
1172 and Ren, B. 2005. A high-resolution map of active promoters in the human genome. *Nature*  
1173 436(7052), pp. 876–880.
- 1174 Kopp, F. and Mendell, J.T. 2018. Functional classification and experimental dissection of long  
1175 noncoding rnas. *Cell* 172(3), pp. 393–407.
- 1176 Kouno, T., Moody, J., Kwon, A.T.-J., Shibayama, Y., Kato, S., Huang, Y., Böttcher, M., Motakis,  
1177 E., Mendez, M., Severin, J., Luginbühl, J., Abugessaisa, I., Hasegawa, A., Takizawa, S.,  
1178 Arakawa, T., Furuno, M., Ramalingam, N., West, J., Suzuki, H., Kasukawa, T. and Shin, J.W.  
1179 2019. C1 CAGE detects transcription start sites and enhancer activity at single-cell resolution.  
1180 *Nature Communications* 10(1), p. 360.
- 1181 Kuo, C.-C., Hänzelmann, S., Sentürk Cetin, N., Frank, S., Zajzon, B., Derks, J.-P., Akhade,  
1182 V.S., Ahuja, G., Kanduri, C., Grummt, I., Kurian, L. and Costa, I.G. 2019. Detection of RNA-DNA  
1183 binding sites in long noncoding RNAs. *Nucleic Acids Research*.
- 1184 Li, B. and Wang, J.H.-C. 2011. Fibroblasts and myofibroblasts in wound healing: force  
1185 generation and measurement. *Journal of tissue viability* 20(4), pp. 108–120.
- 1186 Li, H., Handsaker, B., Wysoker, A., Fennell, T., Ruan, J., Homer, N., Marth, G., Abecasis, G.,  
1187 Durbin, R. and 1000 Genome Project Data Processing Subgroup 2009. The Sequence  
1188 Alignment/Map format and SAMtools. *Bioinformatics* 25(16), pp. 2078–2079.
- 1189 Li, L. and Chang, H.Y. 2014. Physiological roles of long noncoding RNAs: insight from knockout  
1190 mice. *Trends in Cell Biology* 24(10), pp. 594–602.
- 1191 Li, X., Zhou, B., Chen, L., Gou, L.-T., Li, H. and Fu, X.-D. 2017. GRID-seq reveals the global  
1192 RNA-chromatin interactome. *Nature Biotechnology* 35(10), pp. 940–950.
- 1193 Lieberman-Aiden, E., van Berkum, N.L., Williams, L., Imakaev, M., Ragoczy, T., Telling, A.,  
1194 Amit, I., Lajoie, B.R., Sabo, P.J., Dorschner, M.O., Sandstrom, R., Bernstein, B., Bender, M.A.,  
1195 Groudine, M., Gnirke, A., Stamatoyannopoulos, J., Mirny, L.A., Lander, E.S. and Dekker, J.

- 1196 2009. Comprehensive mapping of long-range interactions reveals folding principles of the  
1197 human genome. *Science* 326(5950), pp. 289–293.
- 1198 Liu, S.J., Horlbeck, M.A., Cho, S.W., Birk, H.S., Malatesta, M., He, D., Attenello, F.J., Villalta,  
1199 J.E., Cho, M.Y., Chen, Y., Mandegar, M.A., Olvera, M.P., Gilbert, L.A., Conklin, B.R., Chang,  
1200 H.Y., Weissman, J.S. and Lim, D.A. 2017. CRISPRi-based genome-scale identification of  
1201 functional long noncoding RNA loci in human cells. *Science* 355(6320).
- 1202 Liu, Y., Cao, Z., Wang, Y., Guo, Y., Xu, P., Yuan, P., Liu, Z., He, Y. and Wei, W. 2018.  
1203 Genome-wide screening for functional long noncoding RNAs in human cells by Cas9 targeting  
1204 of splice sites. *Nature Biotechnology*.
- 1205 Lu, Z., Zhang, Q.C., Lee, B., Flynn, R.A., Smith, M.A., Robinson, J.T., Davidovich, C., Gooding,  
1206 A.R., Goodrich, K.J., Mattick, J.S., Mesirov, J.P., Cech, T.R. and Chang, H.Y. 2016. RNA  
1207 Duplex Map in Living Cells Reveals Higher-Order Transcriptome Structure. *Cell* 165(5), pp.  
1208 1267–1279.
- 1209 Luo, S., Lu, J.Y., Liu, L., Yin, Y., Chen, C., Han, X., Wu, B., Xu, R., Liu, W., Yan, P., Shao, W.,  
1210 Lu, Z., Li, H., Na, J., Tang, F., Wang, J., Zhang, Y.E. and Shen, X. 2016. Divergent lncRNAs  
1211 Regulate Gene Expression and Lineage Differentiation in Pluripotent Cells. *Cell Stem Cell*  
1212 18(5), pp. 637–652.
- 1213 Moffitt, J.R., Hao, J., Wang, G., Chen, K.H., Babcock, H.P. and Zhuang, X. 2016. High-  
1214 throughput single-cell gene-expression profiling with multiplexed error-robust fluorescence in  
1215 situ hybridization. *Proceedings of the National Academy of Sciences of the United States of*  
1216 *America* 113(39), pp. 11046–11051.
- 1217 Mondal, T., Subhash, S., Vaid, R., Enroth, S., Uday, S., Reinius, B., Mitra, S., Mohammed, A.,  
1218 James, A.R., Hoberg, E., Moustakas, A., Gyllenstein, U., Jones, S.J.M., Gustafsson, C.M., Sims,  
1219 A.H., Westerlund, F., Gorab, E. and Kanduri, C. 2015. MEG3 long noncoding RNA regulates the  
1220 TGF- $\beta$  pathway genes through formation of RNA-DNA triplex structures. *Nature*  
1221 *Communications* 6, p. 7743.
- 1222 Murata, M., Nishiyori-Sueki, H., Kojima-Ishiyama, M., Carninci, P., Hayashizaki, Y. and Itoh, M.  
1223 2014. Detecting expressed genes using CAGE. *Methods in Molecular Biology* 1164, pp. 67–85.
- 1224 Pachkov, M., Balwiercz, P.J., Arnold, P., Ozonov, E. and van Nimwegen, E. 2013.  
1225 SwissRegulon, a database of genome-wide annotations of regulatory sites: recent updates.  
1226 *Nucleic Acids Research* 41(Database issue), pp. D214-20.



- 1227 Pedersen, L., Hagedorn, P.H., Lindholm, M.W. and Lindow, M. 2014. A Kinetic Model Explains  
1228 Why Shorter and Less Affine Enzyme-recruiting Oligonucleotides Can Be More Potent.  
1229 *Molecular therapy. Nucleic acids* 3, p. e149.
- 1230 Portoso, M., Ragazzini, R., Brenčič, Ž., Moiani, A., Michaud, A., Vassilev, I., Wassef, M.,  
1231 Servant, N., Sargueil, B. and Margueron, R. 2017. PRC2 is dispensable for HOTAIR-mediated  
1232 transcriptional repression. *The EMBO Journal* 36(8), pp. 981–994.
- 1233 Proudfoot, N.J. 2016. Transcriptional termination in mammals: Stopping the RNA polymerase II  
1234 juggernaut. *Science* 352(6291), p. aad9926.
- 1235 Quek, X.C., Thomson, D.W., Maag, J.L.V., Bartonicek, N., Signal, B., Clark, M.B., Gloss, B.S.  
1236 and Dinger, M.E. 2015. lncRNADB v2.0: expanding the reference database for functional long  
1237 noncoding RNAs. *Nucleic Acids Research* 43(Database issue), pp. D168-73.
- 1238 Quinn, J.J. and Chang, H.Y. 2016. Unique features of long non-coding RNA biogenesis and  
1239 function. *Nature Reviews. Genetics* 17(1), pp. 47–62.
- 1240 Ransohoff, J.D., Wei, Y. and Khavari, P.A. 2018. The functions and unique features of long  
1241 intergenic non-coding RNA. *Nature Reviews. Molecular Cell Biology* 19(3), pp. 143–157.
- 1242 Rinn, J.L., Kertesz, M., Wang, J.K., Squazzo, S.L., Xu, X., Bruggmann, S.A., Goodnough, L.H.,  
1243 Helms, J.A., Farnham, P.J., Segal, E. and Chang, H.Y. 2007. Functional demarcation of active  
1244 and silent chromatin domains in human HOX loci by noncoding RNAs. *Cell* 129(7), pp. 1311–  
1245 1323.
- 1246 Roadmap Epigenomics Consortium, Kundaje, A., Meuleman, W., Ernst, J., Bilenky, M., Yen, A.,  
1247 Heravi-Moussavi, A., Kheradpour, P., Zhang, Z., Wang, J., Ziller, M.J., Amin, V., Whitaker, J.W.,  
1248 Schultz, M.D., Ward, L.D., Sarkar, A., Quon, G., Sandstrom, R.S., Eaton, M.L., Wu, Y.-C. and  
1249 Kellis, M. 2015. Integrative analysis of 111 reference human epigenomes. *Nature* 518(7539),  
1250 pp. 317–330.
- 1251 Roux, B.T., Lindsay, M.A. and Heward, J.A. 2017. Knockdown of Nuclear-Located Enhancer  
1252 RNAs and Long ncRNAs Using Locked Nucleic Acid GapmeRs. *Methods in Molecular Biology*  
1253 1468, pp. 11–18.
- 1254 Sandelin, A., Carninci, P., Lenhard, B., Ponjavic, J., Hayashizaki, Y. and Hume, D.A. 2007.  
1255 Mammalian RNA polymerase II core promoters: insights from genome-wide studies. *Nature*  
1256 *Reviews. Genetics* 8(6), pp. 424–436.
- 1257 Shin, Y., Chang, Y.-C., Lee, D.S.W., Berry, J., Sanders, D.W., Ronceray, P., Wingreen, N.S.,

- 1258 Haataja, M. and Brangwynne, C.P. 2018. Liquid nuclear condensates mechanically sense and  
1259 restructure the genome. *Cell* 175(6), p. 1481–1491.e13.
- 1260 Sridhar, B., Rivas-Astroza, M., Nguyen, T.C., Chen, W., Yan, Z., Cao, X., Hebert, L. and Zhong,  
1261 S. 2017. Systematic Mapping of RNA-Chromatin Interactions In Vivo. *Current Biology* 27(4), pp.  
1262 602–609.
- 1263 Subramanian, A., Tamayo, P., Mootha, V.K., Mukherjee, S., Ebert, B.L., Gillette, M.A.,  
1264 Paulovich, A., Pomeroy, S.L., Golub, T.R., Lander, E.S. and Mesirov, J.P. 2005. Gene set  
1265 enrichment analysis: a knowledge-based approach for interpreting genome-wide expression  
1266 profiles. *Proceedings of the National Academy of Sciences of the United States of America*  
1267 102(43), pp. 15545–15550.
- 1268 Takahashi, K., Tanabe, K., Ohnuki, M., Narita, M., Ichisaka, T., Tomoda, K. and Yamanaka, S.  
1269 2007. Induction of pluripotent stem cells from adult human fibroblasts by defined factors. *Cell*  
1270 131(5), pp. 861–872.
- 1271 Thiel, D., Djurdjevic Conrad, N., Peschutter, R.X., Siebert, H. and Marsico, A. 2018. Identifying  
1272 lncRNA-mediated regulatory modules via ChIA-PET network analysis. *Biorxiv*, p. 331256.  
1273 Available at: <https://doi.org/10.1101/331256> [Accessed: 22 April 2019].
- 1274 Tichon, A., Gil, N., Lubelsky, Y., Havkin Solomon, T., Lemze, D., Itzkovitz, S., Stern-Ginossar,  
1275 N. and Ulitsky, I. 2016. A conserved abundant cytoplasmic long noncoding RNA modulates  
1276 repression by Pumilio proteins in human cells. *Nature Communications* 7, p. 12209.
- 1277 Tonekaboni, S.A.M., Mazrooei, P., Kofia, V., Haibe-Kains, B. and Lupien, M. 2018. CREAM:  
1278 Clustering of genomic REgions Analysis Method. *Biorxiv*, p. 222562.
- 1279 Ulitsky, I. 2016. Evolution to the rescue: using comparative genomics to understand long non-  
1280 coding RNAs. *Nature Reviews. Genetics* 17(10), pp. 601–614.
- 1281 Volders, P.-J., Verheggen, K., Menschaert, G., Vandepoele, K., Martens, L., Vandesompele, J.  
1282 and Mestdagh, P. 2015. An update on LNCipedia: a database for annotated human lncRNA  
1283 sequences. *Nucleic Acids Research* 43(Database issue), pp. D174-80.
- 1284 Wiedenheft, B., Sternberg, S.H. and Doudna, J.A. 2012. RNA-guided genetic silencing systems  
1285 in bacteria and archaea. *Nature* 482(7385), pp. 331–338.
- 1286 Wingett, S., Ewels, P., Furlan-Magaril, M., Nagano, T., Schoenfelder, S., Fraser, P. and  
1287 Andrews, S. 2015. HiCUP: pipeline for mapping and processing Hi-C data. [version 1; peer  
1288 review: 2 approved, 1 approved with reservations]. *F1000Research* 4, p. 1310.
